1  
2  
3  
4  
5  
6  
7  
8  
9  
10  
11  
12  
13  
14  
15  
16  
17  
18  
19  
20  
21  
22  
23  
24  
25  
26  
27  
28  
29  
30  
31  
32  
33  
34

TnCentral: A Prokaryotic Transposable Element Database and Web Portal for Transposon  
Analysis

Karen Ross<sup>1§</sup>, Alessandro M. Varani<sup>2§</sup>, Erik Snesrud<sup>3\*</sup>, Hongzhan Huang<sup>4</sup>, Danillo Oliveira  
Alvarenga<sup>2</sup>, Jian Zhang<sup>1</sup>, Cathy Wu<sup>4</sup>, Patrick McGann<sup>3</sup>, Mick Chandler<sup>5</sup>

<sup>1</sup>Protein Information Resource, Department of Biochemistry and Molecular & Cellular  
Biology, Georgetown University Medical Center, Washington, DC, USA.

<sup>2</sup>School of Agricultural and Veterinary Sciences, Universidade Estadual Paulista, Jaboticabal,  
Sao Paulo, Brazil.

<sup>3</sup>Multidrug-Resistant Organism Repository and Surveillance Network, Walter Reed Army  
Institute of Research, Silver Spring, Maryland, USA.

<sup>4</sup>Protein Information Resource, Center for Bioinformatics and Computational Biology,  
University of Delaware, USA

<sup>5</sup>Department of Biochemistry and Molecular & Cellular Biology, Georgetown University  
Medical Center, Washington, DC, USA

<sup>§</sup>These authors contributed equally to this work.

\*We would like to dedicate this article to the memory of Erik Snesrud who was  
instrumental in initiating this work but was sadly unable to see it completed.

Keywords: Mobile Genetic Elements, genome evolution, antibiotic resistance, virulence

## 35 **Importance**

36           The ability of bacteria to undergo rapid evolution and adapt to changing  
37 environmental circumstances drives the public health crisis of multiple antibiotic resistance  
38 as well as outbreaks of disease in economically important agricultural crops and animal  
39 husbandry. Prokaryotic transposable elements (TE) play a critical role in this. Many carry  
40 “passenger genes” (not required for the transposition process) conferring resistance to  
41 antibiotics or heavy metals or causing disease in plants and animals. Passenger genes are  
42 spread by the normal TE transposition activities, by insertion into plasmids which then  
43 spread via conjugation within and across bacterial populations. Thus, an understanding of  
44 TE composition and transposition mechanisms is key to developing strategies to combat  
45 bacterial pathogenesis. Toward this end, we have developed TnCentral, a bioinformatics  
46 resource dedicated to describing and exploring the structural and functional features of  
47 prokaryotic TE and whose use is intuitive and accessible to users with or without  
48 bioinformatics expertise.

## 49 **Abstract**

50           We describe here the structure and organization of TnCentral  
51 (<https://tncentral.proteininformationresource.org/>), a web resource for prokaryotic  
52 transposable elements (TE). TnCentral currently contains ~400 carefully annotated TE,  
53 including transposons from the Tn3, Tn7, Tn402 and Tn554 families, compound  
54 transposons, integrons and associated insertion sequences (IS). These TE carry passenger  
55 genes, including genes conferring resistance to over 25 classes of antibiotics and nine types  
56 of heavy metal as well as genes responsible for pathogenesis in plants, toxin/antitoxin gene  
57 pairs, transcription factors and genes involved in metabolism. Each TE has its own entry  
58 page providing details about its transposition genes, passenger genes, and other sequence  
59 features required for transposition as well as a graphical map of all features. TnCentral  
60 content can be browsed and queried through text and sequence-based searches with a  
61 graphic output. We describe three use cases, which illustrate how the search interface,  
62 results tables, and entry pages can be used to explore and compare TEs.

63           TnCentral also includes downloadable software to facilitate user-driven  
64 identification, with manual annotation, of certain types of TE in genomic sequences.

65 Through the TnCentral homepage, users can also access TnPedia which provides  
66 comprehensive reviews of the major TE families including an extensive general section, and  
67 specialised sections with descriptions of insertion sequence and transposon families.  
68 TnCentral and TnPedia are intuitive resources that can be used by clinicians and scientists to  
69 assess TE diversity in clinical, veterinary and environmental samples.

70

## 71 **Introduction**

72

73 Transposable elements (TE) are key facilitators of bacterial evolution and adaptation  
74 and central players in the emergence of antibiotic and heavy metal resistance and to the  
75 transmission of virulence and pathogenic traits. Some TE can capture “passenger genes”  
76 (genes not involved in the transposition process) encoding these traits and transmit them to  
77 plasmids, where they accumulate and are then transferred within and between bacterial  
78 populations by conjugation. TE also contribute significantly to the on-going reorganization of  
79 bacterial genomes giving rise to new strains that are more adept at proliferating in clinical  
80 and agricultural environments, as well as in natural ecosystems.

81 Understanding TE nature, distribution, and activity is therefore an indispensable part  
82 of the struggle to cope with the public health crisis of multiple antibiotic resistance (ABR)  
83 [1,2]. To understand the impact of TE on bacterial populations, it is essential to provide a  
84 detailed description and catalog of TE structures and diversity. The simplest TE, known as  
85 Insertion Sequences (IS), have a profound impact on genome organization and function (see  
86 [3–7]) but do not themselves generally carry integrated passenger genes. There are a large  
87 number of significantly more complex TE (Figure 1), arguably even more important in the  
88 global emergence of ABR and other virulence and pathogenicity traits. These are generically  
89 called transposons and may carry multiple passenger genes, including some of the most  
90 clinically important antibiotic resistance genes. Like IS, these TE are grouped into a number  
91 of distinct families with characteristic organizations [3]. Their transposition activities  
92 facilitate the rapid spread of groups of antibiotic resistance genes and promote their  
93 horizontal transfer. Yet another important aspect of their impact is their ability to assemble  
94 passenger genes into resistance clusters [8,9]. While there appears to be a wide-spread  
95 appreciation that mobile plasmids are responsible for the spread of antibiotic resistance, it

96 is less well-known that IS and transposons are the conduits that transfer this information  
97 between chromosomes and plasmids.

98         There are a number of other bioinformatics resources that cover aspects of  
99 prokaryotic TE biology. These include databases for TE passenger genes such as antibiotic  
100 resistance (CARD [10], ARDB [11]) or toxin/antitoxin gene pairs (TADB [12], TASmania [13])  
101 as well as the various classes of TE themselves such as insertion sequences (ISfinder [14]),  
102 integrons (INTEGRALL [15]), integrative conjugative elements, ICE (ICEberg [16,17]),  
103 plasmids (PlasmidFinder [18]) or more general databases which include a variety of these  
104 genome components (ACLAME [19–21]). However, there is a need for a resource that  
105 collects, compares and collates detailed information on the various different classes of TE  
106 that are responsible for the transmission of medically and economically important  
107 passenger genes in an intuitive and accessible way.

108         Here, we describe TnCentral (<https://tncentral.proteininformationresource.org/>), a  
109 database of detailed structural and functional information on bacterial TE. Additionally,  
110 TnCentral provides access to TnPedia (<https://tnpedia.fcav.unesp.br/>), a comprehensive  
111 encyclopedia describing the current state of our knowledge of the biology of IS and  
112 transposons. Together, TnCentral and TnPedia provide a detailed description of TE diversity  
113 with easy-to-understand graphics outputs that are accessible to users without significant  
114 bioinformatic knowledge. They allow users to rapidly analyse the landscape of TE in  
115 genomes (chromosomes and plasmids) isolated from clinical, veterinary and environmental  
116 samples.

## 117 **Results**

### 118 **TnCentral Website Content**

119 As of May 2021, TnCentral contains information on ~400 TE. About half of these TE are *Tn3*-  
120 family transposons. The remainder are integrons, compound transposons, transposons from  
121 the *Tn402*, *Tn554* and *Tn7* families, and IS that are associated with TE or are part of  
122 compound transposons (Supplementary Table 1). They include TE with resistance to over 25  
123 different classes of antibiotics and nine different heavy metals. The collection also contains  
124 TE that carry a toxin/antitoxin system for bacterial plasmid maintenance [22–24] and TE  
125 from xanthomonads carrying genes for plant pathogenicity.

126

## 127 **TnCentral Web Portal**

128 The TnCentral home page is designed to give the user easy access to the contents of  
129 TnCentral with a number of options (Figure 2A), including:

130 **TnCentral Search** (*search of the TnCentral database*),

131 **Sequence Search** (*BLAST-like search for sequence similarities in the database*),

132 **Browse Tn list** (*view all TE in TnCentral*),

133 **Tnfinder Software** (*access to downloadable scripts for identifying potential TE in  
134 sequence databases*),

135 **Documentation** (*downloadable documentation for TnCentral*),

136 **For Curators** (*detailed curation guidelines*),

137 **TnPedia** (*TE Encyclopedia*),

138 **Related links**, and

139 **Feedback**.

140

141 **TnCentral Search.** The interface provides a variety of search functions divided into two  
142 search types: **Transposon search** and **Gene search** (Figure 2B).

143

144 **Transposon search.** The transposon collection can be searched using the transposon  
145 **name**, **synonyms** which may have been used in the literature, the **type** of mobile genetic  
146 element (e.g., insertion sequence, transposon or integron), the **family** and **subgroup** to  
147 which it belongs, the **host organism**, **country** of identification and **date** of identification. The  
148 latter three search terms are intended for use in epidemiological tracking. These search  
149 terms result in a table that can be sorted, customized and downloaded (See Use Case #1,  
150 below).

151 **Gene search.** It is also possible to search for TE-associated genes by name, by class  
152 (Transposase, Accessory Gene or Passenger Gene) or by function (Antibiotic Resistance,  
153 Heavy Metal Resistance) and to retrieve information on the transposons in which they are  
154 found (see Use Case #2, below).

155

156 **Sequence Search.** Sequence Search allows users to perform sequence similarity

157 searches using BLAST [26,27] (see Use Case #3, below). By default, the search database is  
158 the TnCentral database, but the page also provides links to BLAST against the ISfinder  
159 (<https://isfinder.biotoul.fr/blast.php>), NCBI <https://blast.ncbi.nlm.nih.gov/Blast.cgi>),  
160 Comprehensive Antibiotic Resistance Database (CARD;  
161 <https://card.mcmaster.ca/analyze/blast>) and the Toxin-Anitoxin (TADB;  
162 <https://bioinfo-mml.sjtu.edu.cn/TADB2/>) databases. The BLAST tool automatically  
163 distinguishes between DNA and protein query sequences.

164

165 **Browse Tn list.** This option allows the user to browse the entire TnCentral database.

166

167 **The Transposon entry page.** All of the search and browse options provide links to entry  
168 pages for each TE (Figure 3), which provide detailed information about TE features and  
169 origins. The page includes: 1) host information: host species, strain, and  
170 plasmid/chromosome in which the transposon was found as well as the date and geographic  
171 location of the isolate; 2) a graphic representation of the annotated sequence with color-  
172 coded features; 3) Terminal Inverted Repeats (IR); 4) DNA sequence; 5) internal  
173 recombination sites (e.g. *res* sites) including their coordinates, length and DNA sequence; 6)  
174 ORF summary, which includes all protein coding genes in the order in which they appear, 5'-  
175 3', in the TE sequence, the element with which they are associated (important for nested TE  
176 in which one TE is inserted into another), their coordinates, their class (e.g., Transposase,  
177 Accessory Gene, Passenger Gene) and subclass (e.g., Antibiotic Resistance, Heavy Metal  
178 Resistance) and their relative orientation within the TE; 7) a detailed ORF description  
179 including the amino acid sequence; 8) if applicable, a table of Internal Transposable  
180 Elements (TE inserted in the main element) including the name, type location and length; 9)  
181 if applicable, a table of Internal Repeats (repeat elements, other than the terminal inverted  
182 repeats, that are found within the TE), including the associated TE, coordinates and DNA  
183 sequence; 10) Bibliographic references with direct links to PubMed [25]. Each section can be  
184 collapsed using a button on the right-hand side of the section heading. Sections can be  
185 viewed either by scrolling down on the page or by clicking on the section name in the menu  
186 located on the left side of the page. Sequence files in FASTA and GenBank format can be  
187 downloaded using the links on the left side of the page under the menu.

188

189

190 **Tnfinder Software.** This section provides three user-downloadable scripts written in-house  
191 for identifying transposons. They provide users with local control over analyses and help  
192 them screen datasets containing large numbers of genomic sequences using their own  
193 servers for identifying potential candidates and which are then manually curated.

194

195 ***Tn3 Transposon Finder*** (Tn3\_finder) performs the automatic prediction of  
196 transposable elements of the Tn3 family in bacteria and archaea. It compares user-provided  
197 bacterial and archaeal genome sequences to custom Tn3 transposase and resolvase  
198 databases by BLAST alignments. The criteria for identifying potential transposon regions  
199 according to similarity, coverage and distance values can be adjusted by the user. Additional  
200 ORFs that might be related to passenger genes are also predicted, and flanking regions can  
201 also be retrieved and analyzed. The automatic prediction results are written in report files  
202 and pre-annotated GenBank files to help in subsequent manual curation. Tn3\_finder allows  
203 for the concurrent analysis of multiple genomes by multithreading.

204 ***Composite Transposon Finder*** (TnComp\_finder) predicts the putative composite  
205 transposons in bacterial and archaeal genomes based on insertion sequence replicas in a  
206 relatively short span. It works by comparing nucleotide sequences from bacterial and  
207 archaeal genomes to a custom transposon database and identifying duplicated transposons  
208 in user-defined genomic regions from BLAST alignments. Similar to Tn3\_finder,  
209 multithreaded analyses of multiple genomes are available and parameters for similarity,  
210 coverage, distance and flanking regions can be adjusted by the user. Results are written in  
211 report files and pre-annotated GenBank files to help in subsequent manual curation.

212 ***Antibiotic Resistance Gene-associated IS Finder*** (ISAbR\_finder) is an experimental  
213 program for the automatic prediction of antibiotic resistance genes associated with known  
214 IS elements derived from the ISfinder database and has yet to be tested extensively. It  
215 works by comparing IS nucleotide sequences from bacterial and archaeal genomes to a  
216 custom antibiotic resistance database based on the parsing of BLAST alignment results,  
217 using a number of parameters that can be customized by the user for stricter or more  
218 relaxed criteria and allowing multithreaded alignments of multiple genomes. ISAbR\_finder

219 also produces report files and pre-annotated GenBank files on which the recommended  
220 manual curation should be performed.

221

222 **Documentation.** This section, which can be downloaded as a pdf file, provides a short  
223 background description of transposons and TnCentral together with a short description of  
224 the **curation workflow** and of planned future developments.

225

226 **For Curators.** This section provides a detailed description of the curation workflow used in  
227 generating the annotated TnCentral data.

228 **TnPedia.** TnCentral provides access from the homepage to TnPedia, an online knowledge  
229 base which contains information concerning transposition in prokaryotes. TnPedia is  
230 developed using MediaWiki (<https://www.mediawiki.org>) and can also be accessed directly  
231 (<https://tnpedia.fcav.unesp.br/>). It is structured into three main sections: **General**  
232 **Information, IS Families and Transposon Families** (Figure 4).

233 The **General Information** section provides a series of clickable sections with an  
234 extensive bibliography and direct links to the articles in PubMed. It includes a historical  
235 perspective, definitions and descriptions of a variety of prokaryotic TE, the basic  
236 mechanisms involved in their movement and the enzymes involved in these processes. It  
237 also contains information describing their impact on their host genomes and how their  
238 activities are controlled.

239 The **IS Families** section consists of individual chapters describing each of the ~25 IS  
240 families in detail and covers, where possible, the identification of the founding members,  
241 their organisation, distribution, variability and phylogenetic relationships, regulation of their  
242 transposition, impact on their host genomes, and their transposition mechanisms including  
243 genetic, biochemical and structural studies.

244 The **Transposon Families** section describes each transposon family with similar  
245 information to that included in the IS family descriptions but, in addition, including a  
246 detailed description of their structures and the passenger genes which they may carry.

247

248 **Examples of TnCentral Use**



## 249 **Use Case #1: Comparing Protein Coding Genes in Tn554 Family Members**

250 The Tn554 family is a small family restricted to the Firmicutes. Members encode three  
251 genes, *tnpA*, *tnpB* and *tnpC*, involved in transposition [28,29]  
252 ([https://tnpedia.fcav.unesp.br/index.php/Transposons\\_families/Tn554\\_family](https://tnpedia.fcav.unesp.br/index.php/Transposons_families/Tn554_family)). TnpA and  
253 TnpB both exhibit a C-terminal motif which shares all the important catalytic residues of a  
254 typical tyrosine site-specific recombinase [28,29]. They insert in a sequence-specific way  
255 into the DNA repair gene *radC* [30,31] and can also be found in a circular form [32–36]. To  
256 compare the protein coding genes in Tn554 family members side by side, we searched for  
257 Tn554 in the TE family field of the Transposon Search interface (Figure 5A). Fourteen Tn554  
258 family members were found (of which only 10 are shown in Figure 5B). In order to perform a  
259 side-by-side comparison of the protein-coding genes in these TE, we used the Customize  
260 Display option on the search results page, to add the “All Gene Fields” columns, which  
261 provide information about the protein coding genes, to the display and to remove several  
262 columns (e.g., Host Organism, Country) (Figure 5B). Results for two of the Tn554  
263 transposons (Tn558.3 and Tn559) are shown in Figure 5C. Both transposons have the three-  
264 part transposition module (*tnpA*, *tnpB*, *tnpC*) characteristic of the family. However, the two  
265 transposons are quite diverse in their passenger genes. Tn558.3 has gene called *fla*, which  
266 contains a flavodoxin-like domain, and the ABR gene *fexA*, which confers resistance to  
267 phenicol antibiotics. Tn559 has just a single passenger gene, the ABR gene, *dfrK*, which  
268 confers resistance to diaminopyrimidine antibiotics. As shown by this example, the flexible  
269 search results page makes it easy to compare features across multiple transposons.

270

## 271 **Use Case #2: Type II Toxin/Antitoxin Systems in Tn3 Transposons**

272 Toxin/Antitoxin (TA) systems are implicated in plasmid maintenance in bacterial populations  
273 [37]. These systems are characterized by a stable toxin and an unstable antitoxin that binds  
274 to the toxin and inhibits its lethal effect. Loss of a plasmid carrying a TA system will lead to  
275 rapid depletion of the antitoxin, allowing the persistent toxin to kill the cell. Thus, only  
276 members of a population that retain the plasmid will survive. Recently, a set of Tn3-family  
277 transposons carrying TA systems were characterized and included in the TnCentral database  
278 [22]. To explore these Tn, we used the TnCentral Gene Search function, selecting “Passenger  
279 Gene” from the Gene Class pull-down menu and “Toxin” from the Gene Sub-Class pull-down

280 menu (Figure 6A, red box). The search results included eight different toxin genes (Gp49,  
281 HEPN, PIN, PIN\_3, *abiEii*, *higB*, *parE*, and zeta) found in 43 different transposons. Similarly,  
282 transposons carrying antitoxin genes were identified using the Gene Search function with  
283 the Gene Sub-Class menu set to “Antitoxin” (Figure 6B, red box). There were 44 transposons  
284 carrying 11 different antitoxin genes. Combinations of toxin and antitoxin genes in individual  
285 transposons were examined by going to the ORF Summary section of the entry pages for the  
286 TA transposons. For example, Tn*Sku1* (Figure 6B, yellow box; Figure 6C) has a Gp49 toxin  
287 gene and an antitoxin gene containing an HTH domain (referred to as HTH). Most  
288 transposons have a single toxin/antitoxin gene pair except for Tn*Xca1*, which has two TA  
289 pairs, and Tn*5501.5*, which has a *parD* antitoxin gene and no toxin gene. The majority of  
290 Tn*5501* derivatives in TnCentral have a *parE* toxin gene as well as the *parD* antitoxin,  
291 suggesting that Tn*5501.5* may have undergone a deletion in the region containing *parE*  
292 (Supplementary Figure 1).

293

### 294 **Use Case #3: Tn21 and its Relatives**

295 Tn*21* is the canonical member of a subfamily of Tn3 transposons that confers a variety of  
296 antibiotic resistances [38–40] and several analyses have proposed mechanisms to explain  
297 how Tn*21* arose from simpler ancestor transposons (e.g., [40,41]). Tn*21* has a mercury  
298 resistance operon at the 5'- (left) end, a *tnpA/tnpR* transposition module at the 3'-(right)  
299 end, and a transposition-deficient integron (In2) carrying several ABR genes (a GCN5-related  
300 N-acetyltransferase (GNAT\_fam), *sul1*, *qacEdelta1*, and *aadA*) in the middle (Supplementary  
301 Figure 2). These ABR genes confer resistance to aminoglycosides, sulfones, sulfonamides,  
302 quaternary ammonium salts, and acridine dye. More recently, a transposon that lacks the  
303 integron insertion but is otherwise identical to Tn*21* (the hypothetical Tn*21* backbone Tn21Δ  
304 in [40]) was discovered [42]. This transposon, Tn*5060*, was proposed to be the ancestor of  
305 Tn*21* [42]. Tn*21* also has numerous relatives that carry different combinations of antibiotic  
306 resistance genes within and outside the integron. To explore the Tn*21* subfamily, we  
307 performed a TnCentral Sequence Search (BLAST) using the putative ancestral Tn*5060*  
308 sequence (Figure 7A). In addition to Tn*5060* itself, we identified ten transposons in the  
309 database (Tn*20*, Tn*21*, Tn*21.1*, Tn*21.2*, Tn*5086*, Tn*2411*, Tn*2424*, Tn*4*, Tn*1935*, and Tn*As3*;  
310 Supplementary Figure 2) that contain all (or nearly all) of the Tn*5060* sequence. With the

311 exception of Tn20, which is almost identical to Tn5060 (99.5%), these transposons have two  
312 or more discontinuous sub-regions that align to Tn5060. For example, Tn21 has two sub-  
313 regions, one of which is a close match to the left half of Tn5060 and the other of which is a  
314 close match to the right half of Tn5060 (red bars in Figure 7B). This suggests that these  
315 transposons arose from Tn5060 via the insertion of other sequences.

316

317 We compared the antibiotic resistance profiles of the ten transposons by inspecting their  
318 TnCentral entry pages. Tn20, like Tn5060, carries no ABR genes. The other nine transposons  
319 carry ABR genes targeting aminoglycosides, sulfones, sulfonamides, and quaternary  
320 ammonium salts (Figure 7C). Other resistances found in a subset of the six include acridine  
321 dye (Tn1935, Tn21, Tn2411, Tn4, TnAs3, Tn2424, Tn5086), carbapenams (Tn1935 and Tn4),  
322 cephalosporins (Tn1935 and Tn4), carbapenems (Tn4), monobactams (Tn4), phenicols  
323 (TnAs3, Tn2424, Tn21.1, Tn21.2), diaminopyrimidines (Tn5086, Tn21.1, Tn21.2), and  
324 tetracyclines (Tn21.2). Interestingly, in some cases where the transposons have resistances  
325 in common, they are conferred by different genes (Figure 7C). For example, phenicol  
326 resistance is conferred by *CAT* in TnAs3, *catB2* in Tn2424, and *cmlA6* in Tn21.1 and Tn21.2.  
327 Similarly, sulfonamide and sulfone resistance is conferred by *sul1* in all of the antibiotic-  
328 resistant family members except for Tn21.1 and Tn21.2, where those resistances are  
329 conferred by *sul3*. Thus, even this closely related subfamily of transposons shows diversity in  
330 its antibiotic resistance genes. This is partially due to the flexibility of the integron to  
331 incorporate new antibiotic resistance gene cassettes but also to insertion of ABR-gene  
332 containing elements outside of the integron region (e.g., Tn3.1 in Tn4, Supplementary Figure  
333 2).

334

## 335 Discussion

336 Here, we have described TnCentral, a user-friendly resource for exploration of prokaryotic  
337 TE. TnCentral provides a flexible search interface, TE-specific entry pages with intuitive  
338 graphics and detailed information about TE features, and a BLAST interface that allows users  
339 to identify TE that carry features of interest or to identify TE that are present in sequences  
340 of interest (e.g., plasmids). As shown in the use cases, the flexible search results page makes  
341 it easy to compare features across multiple transposons, the detailed entry pages allow

342 exploration of TE passenger genes, such as ABR genes, and the Sequence Search enables  
343 retrieval of TE with related sequences that could be used as a starting point for evolutionary  
344 analyses. Moreover, TnCentral provides access to Tnfinder software for locating candidate  
345 TE in sequence data and to TnPedia, a comprehensive review of the biology of selected TE  
346 families.

347

348 As discussed in the Introduction, a variety of resources dedicated to aspects of prokaryotic  
349 TE biology currently exist. TnCentral's unique contribution to this universe of resources lies  
350 in its coverage of a variety of TE (e.g. different transposon families and compound  
351 transposons with their associated IS and integrons) and its detailed focus on both core  
352 transposition genes and passenger genes of clinical, environmental, and economic  
353 importance. It has the additional feature of providing a clear graphic output for visualizing  
354 the often complex structures of TE.

355 The next step beyond annotation of individual TE is to annotate and visualize the TE content  
356 of prokaryotic chromosomes and plasmids. These studies are critical for understanding the  
357 propagation of high impact passenger genes, such as those that confer antibiotic resistance.  
358 Several tools that address this problem are available. For example, ISsaga [43], which is  
359 integrated into ISfinder, annotates IS present in user-provided sequences. Other software  
360 suites have been designed specifically to annotate IS in short read raw data (e.g. ISQuest  
361 [44], Transposon Insertion Finder [45], ISMapper [46] and panISa [47]) using preassembled  
362 libraries of TE and their components, while yet other approaches are based on *ab initio*  
363 prediction (e.g., OASIS [48], ISseeker [49] ISEscan [50], or provide a comparative view of IS  
364 mobilisation events (e.g. ISCompare [51]). These annotation tools are only as good as their  
365 underlying TE databases. ISfinder, which includes nearly 6000 individual examples of IS  
366 classified in distinct families and subfamilies according to their transposition mechanism and  
367 structural organization, provides such a rigorous framework for IS and has been  
368 incorporated into a number of annotation pipelines (e.g., ISsaga [43], MobileElementFinder  
369 [52]). However, IS represent only a fraction of prokaryotic TE, and unlike transposons and  
370 integrons, they rarely carry passenger genes. We hope that TnCentral will become a  
371 benchmark for more complex TE as ISfinder is for IS.

372 TnCentral is an ongoing project, and we will continue to expand and update the content. In  
373 addition to the exporting annotated TE in GenBank format, we plan to make all files  
374 available in a SnapGene file format which will allow users to use SnapGene  
375 (<https://www.snapgene.com/>), a commercial software tool (with a free viewer version) for  
376 visualizing and documenting nucleotide sequences and their features, to analyze and  
377 explore them. We also intend to enhance the visualization of TnCentral Sequence Search  
378 (i.e., BLAST) results to better support the analysis of plasmid sequences that may carry a  
379 complex complement of TE although it should be noted that the Sequence Search tool can  
380 already accommodate analysis of large plasmids. Ultimately, we envision that TnCentral  
381 could be used to analyze the TE content of a collection of sequences, such as patient,  
382 veterinary and environmental samples from an antibiotic resistance outbreak, to  
383 understand TE-driven evolution of the prokaryotic mobilome.

## 384 **Methods**

### 385 **Curation Workflow**

386 The TnCentral curation workflow is depicted in Figure 8. Curation is performed by members  
387 of the TnCentral development team as well as by graduate students in bioinformatics  
388 courses at Georgetown University Medical Center. TnFinder scripts are run against RefSeq  
389 and other sequence databases and GenBank files potentially containing TE are retrieved. TE  
390 sequences are isolated and annotated using SnapGene ([https://www.snapgene.com](https://www.snapgene.com/)).  
391 Features of interest (i.e., protein coding genes, TE, repeat elements, and recombination  
392 sites) are annotated according to detailed curation guidelines (provided in the “For  
393 Curators” of TnCentral). Fully annotated features are saved in a SnapGene Custom Library.  
394 New transposon sequences can be searched against this library, enabling detection of  
395 features previously identified in other TEs. All annotated TE files are checked by a second  
396 curator. An enhanced GenBank file containing all annotations is exported from SnapGene  
397 and checked for common curation formatting errors using a custom Perl script. Detected  
398 errors are manually corrected in the SnapGene file, which is then exported as a revised  
399 enhanced GenBank file. Information from this GenBank file is used to populate the  
400 TnCentral database, which, in turn, serves as the backend for the TnCentral web portal. An

401 image file showing a color-coded map of TE features is also exported from SnapGene and  
402 displayed on the TE entry page.

403

404 Although we have adhered to the standard nomenclature for transposons extracted from  
405 the literature, for the many transposons newly identified during TnCentral database-  
406 building, we have temporarily used names indicating their source. In all cases, the  
407 Transposon Registry [53] accession number is provided as a synonym. There is some  
408 ambiguity in the literature concerning class 1 integrons and members of the Tn402  
409 transposon family. Class 1 integrons appear to be derivatives of this transposon family and  
410 include members with a range of Tn402 transposition genes with varying degrees of  
411 completeness. We have therefore elected to include all Class 1 integrons as members of the  
412 Tn402 family (Supplementary Table S1). ISfinder classification is used for the individual IS  
413 and in the case of compound transposons, the group to which they are belong is defined by  
414 the flanking IS.

415

416 Properties of protein coding genes are annotated with cross-references to database or  
417 ontology identifiers whenever possible. Antibiotic resistance gene properties, including gene  
418 name, sequence family, antibiotic resistance mechanism, and target drug classes are  
419 annotated according to the Antibiotic Resistance Ontology (ARO) as presented in  
420 Comprehensive Antibiotic Resistance Database (CARD) [10]. The Pfam [54] and InterPro  
421 resources [55] are used to define sequence family information.

422

### 423 **TnCentral Website implementation**

424 TE features and sequence information are extracted from the enhanced GenBank files. TE  
425 feature information is used for the search and the entry pages, and the TE DNA and protein  
426 sequence information are used for the Sequence Search and display. The extracted data is  
427 loaded into the TnCentral database, implemented using MySQL. The website is built on a  
428 Linux server with Apache, and the web application is built on Perl CGI. Apache Lucene is  
429 used to index the data for flexible and fast search and retrieval. JavaScript is used for the  
430 interactive web-interface and display. BLAST is used for similarity search.

431

432 **Acknowledgements**

433 We would like to thank John Dekker (NIAID, NIH Bethesda, Md, USA), Fred Dyda and Alison  
434 Hickman (NIDDK, NIH Bethesda, Md, USA), Patricia Siguier (CNRS Toulouse, France), Susu He  
435 (Nanjing University Medical School, Nanjing, China), Laurence van Melderen (Université  
436 Libre de Bruxelles, Belgium), and Gipsi Lima-Mendez and Bernard Hallet (Université de  
437 Louvain la Neuve, Belgium) for helpful discussions; Ben Glick (University of Chicago,  
438 SnapGene) for his help with the SnapGene software; the student curators at Georgetown  
439 University Medical Center for their contributions to the annotation process; and the Protein  
440 Information Resource (University of Delaware, Georgetown University Medical Center) for  
441 informatics support. This project was supported the U.S. Department of Defense (DoD)  
442 Global Emerging Infections Surveillance (GEIS) Branch (P0020\_18\_WR) and by institutional  
443 resources at the Center for Bioinformatics and Computational Biology, University of  
444 Delaware.

445

446 **Figure Legends**

447

448 **Figure 1.** Structural arrangement of prokaryotic Transposable Elements. The TE is indicated  
449 by a pale-yellow horizontal bar at the top of each section. Open reading frames are shown  
450 as horizontal arrows with the arrowheads indicating the direction of expression: purple,  
451 transposition-associated genes; red, antibiotic resistance genes; green, other passenger  
452 genes. The inverted terminal repeats found at the ends of the majority of TE are shown as  
453 grey arrows and the direct target repeats generally produced by insertion are indicated by  
454 small black arrows. **A.** Insertion Sequence (IS), a short DNA segment encoding only the  
455 mobilization protein (Transposase, TnpA), flanked by two imperfect Inverted Repeats (IRs),  
456 and generally containing a short flanking directly repeated duplication (DR) on the target of  
457 insertion. **B.** tIS (transporter IS) are structurally similar to an IS, but contain passenger genes.  
458 They are presently restricted to the IS1595 and IS66 families. **C.** Compound transposons are  
459 formed by two IS in either direct or inverted orientation, flanking a variety of passenger  
460 genes including those for antibiotic resistance. **D.** Transposons are more heterogeneous  
461 structures and include different sets of transposition-related genes which are specific to  
462 each Tn family and multiple antibiotic resistances, virulence and other passenger genes. This  
463 is an example of a Tn3 family transposon with transposon, *tnpA*, and resolvase genes, *tnpR*.

464

465 **Figure 2.** A) TnCentral homepage showing clickable links to various TnCentral sections in the  
466 box on the left. B) TnCentral search interface showing search choices for TE on the left and  
467 for transposition-related and passenger genes on the left.

468

469 **Figure 3.** TnCentral TE Entry Page. #1-10: Sections of the entry page (see text for details).

470

471 **Figure 4.** The main sections of TnPedia, a TnCentral-related wiki compiling information on  
472 prokaryotic transposable elements. Only three of the four sections (General Information, IS  
473 families and Transposon families) are illustrated. The fourth section is a Transposition  
474 Glossary, which is under construction.

475



476 **Figure 5.** Comparing Protein Coding Genes in Tn554 Family Members. A) TnCentral  
477 Transposon Search interface, showing a search for Tn554 in the TE family field. B) Interface  
478 for customizing the columns in the search results display. Clicking on “Customize Display”  
479 (red box) opens the interface. C) Partial Tn554 family search results after customization to  
480 show information on protein coding genes (All Gene Fields).

481

482 **Figure 6.** Exploring Toxin/Antitoxin Genes in TnCentral. A) Partial results of searching  
483 TnCentral for toxin genes. The settings used to obtain these results are shown in the red  
484 box. Links to entry pages for the TE carrying the indicated genes are provided in the MGE  
485 Accession column (e.g., Tn*Sku1*-CP002358.1, yellow box). B) Partial search results for  
486 antitoxin genes in TnCentral. Settings are shown in the red box. C) ORF Summary section of  
487 the entry page for Tn*Sku1*-CP002358.1, showing the presence of a toxin/antitoxin gene pair  
488 (Gp49 toxin/HTH antitoxin).

489

490 **Figure 7.** Analysis of ABR in Tn21 Relatives. A) TnCentral Sequence Search using the  
491 sequence of Tn5060, the proposed ancestor of Tn21, as a query. B) Sequence Search results.  
492 The query sequence is represented by the width of the Alignment column. The red bars  
493 represent regions of the matched transposons that are highly similar to regions of Tn5060.  
494 C) ABR genes and targeted antibiotic classes in Tn21 relatives. Red shading in the table cells  
495 indicates that the transposon carries at least one gene targeting the antibiotic class; blue  
496 shading indicates that it does not. The ABR genes found in each transposon are indicated in  
497 the table cells.

498

499 **Figure 8.** TnCentral Curation Workflow (see text for description).

500

501

## 502 **Supplementary Figures**

503 **Supplementary Figure 1.** Maps of Tn5501 and Tn5501.5 showing the loss of *parE* toxin gene  
504 in Tn5501.5. Feature color code: yellow--TE; purple--transposition genes; dark orange--  
505 toxin/anti-toxin genes; light orange--other open reading frames; grey--repeat elements;  
506 green--recombination sites. Maps were created with SnapGene.

507

508 **Supplementary Figure 2.** Maps of Tn21 and its relatives. The feature color code is the same  
509 as in Supplementary Figure 1. Maps were created with SnapGene. Note that the different  
510 transposon derivatives are not to scale but their individual lengths are included.

511

512 **Supplementary Table S1.** The table displays the entire collection of TE at present in the  
513 database (May 2021) with columns indicating their **TnCentral accession numbers**, their  
514 **names, synonyms** from the literature and/or the Transposon Registry [53], **TE Type, Family**  
515 **Group), Host Organism** and **Molecular Source** (e.g., plasmid or chromosome). If no  
516 information is provided in the Molecular Source column, the source is chromosomal or  
517 unknown.

518

## 519 Bibliography

- 520 1. Spellberg B, Guidos R, Gilbert D, Bradley J, Boucher HW, Scheld WM, Bartlett JG,  
521 Edwards J, Infectious Diseases Society of America. The epidemic of antibiotic-resistant  
522 infections: a call to action for the medical community from the Infectious Diseases  
523 Society of America. *Clin Infect Dis*. 2008 Jan 15;46(2):155–164. PMID: 18171244
- 524 2. O’Neill J. Tackling Drug-Resistant Infections Globally: ' Final Report and  
525 Recommendations. London?: Wellcome Foundation HM Government UK; 2016 May.
- 526 3. Craig, Chandler, Gellert, Lambowitz, Rice, Sandmeyer, editors. Mobile DNA III.  
527 American Society of Microbiology; 2015.
- 528 4. Mahillon J, Chandler M. Insertion sequences. *Microbiol Mol Biol Rev*. 1998  
529 Sep;62(3):725–774. PMCID: PMC98933
- 530 5. Siguier P, Gourbeyre E, Varani A, Ton-Hoang B, Chandler M. Everyman’s guide to  
531 bacterial insertion sequences. *Microbiol Spectr*. 2015 Apr;3(2):MDNA3–0030. PMID:  
532 26104715
- 533 6. Siguier P, Gourbeyre E, Chandler M. Bacterial insertion sequences: their genomic  
534 impact and diversity. *FEMS Microbiol Rev*. 2014 Sep;38(5):865–891. PMCID:  
535 PMC7190074
- 536 7. Vandecraen J, Chandler M, Aertsen A, Van Houdt R. The impact of insertion sequences  
537 on bacterial genome plasticity and adaptability. *Crit Rev Microbiol*. 2017  
538 Nov;43(6):709–730. PMID: 28407717
- 539 8. He S, Chandler M, Varani AM, Hickman AB, Dekker JP, Dyda F. Mechanisms of  
540 Evolution in High-Consequence Drug Resistance Plasmids. *MBio*. 2016 Dec 6;7(6).  
541 PMCID: PMC5142620
- 542 9. He S, Hickman AB, Varani AM, Siguier P, Chandler M, Dekker JP, Dyda F. Insertion  
543 Sequence IS26 Reorganizes Plasmids in Clinically Isolated Multidrug-Resistant Bacteria  
544 by Replicative Transposition. *MBio*. 2015 Jun 9;6(3):e00762. PMCID: PMC4471558
- 545 10. Alcock BP, Raphenya AR, Lau TTY, Tsang KK, Bouchard M, Edalatmand A, Huynh W,  
546 Nguyen A-LV, Cheng AA, Liu S, Min SY, Miroshnichenko A, Tran H-K, Werfalli RE, Nasir  
547 JA, Oloni M, Speicher DJ, Florescu A, Singh B, Faltyn M, Hernandez-Koutoucheva A,  
548 Sharma AN, Bordeleau E, Pawlowski AC, Zubyk HL, Dooley D, Griffiths E, Maguire F,  
549 Winsor GL, Beiko RG, Brinkman FSL, Hsiao WWL, Domselaar GV, McArthur AG. CARD  
550 2020: antibiotic resistome surveillance with the comprehensive antibiotic resistance  
551 database. *Nucleic Acids Res*. 2020 Jan 8;48(D1):D517–D525. PMCID: PMC7145624

- 552 11. Liu B, Pop M. ARDB--Antibiotic Resistance Genes Database. *Nucleic Acids Res.* 2009  
553 Jan;37(Database issue):D443–7. PMID: PMC2686595
- 554 12. Xie Y, Wei Y, Shen Y, Li X, Zhou H, Tai C, Deng Z, Ou H-Y. TADB 2.0: an updated  
555 database of bacterial type II toxin-antitoxin loci. *Nucleic Acids Res.* 2018 Jan  
556 4;46(D1):D749–D753. PMID: PMC5753263
- 557 13. Akarsu H, Bordes P, Mansour M, Bigot D-J, Genevoux P, Falquet L. TASmania: A  
558 bacterial Toxin-Antitoxin Systems database. *PLoS Comput Biol.* 2019 Apr  
559 25;15(4):e1006946. PMID: PMC6504116
- 560 14. Siguier P, Perochon J, Lestrade L, Mahillon J, Chandler M. ISfinder: the reference  
561 centre for bacterial insertion sequences. *Nucleic Acids Res.* 2006 Jan 1;34(Database  
562 issue):D32–6. PMID: PMC1347377
- 563 15. Moura A, Soares M, Pereira C, Leitão N, Henriques I, Correia A. INTEGRALL: a database  
564 and search engine for integrons, integrases and gene cassettes. *Bioinformatics.* 2009  
565 Apr 15;25(8):1096–1098. PMID: 19228805
- 566 16. Bi D, Xu Z, Harrison EM, Tai C, Wei Y, He X, Jia S, Deng Z, Rajakumar K, Ou H-Y. ICEberg:  
567 a web-based resource for integrative and conjugative elements found in Bacteria.  
568 *Nucleic Acids Res.* 2012 Jan;40(Database issue):D621–6. PMID: PMC3244999
- 569 17. Liu M, Li X, Xie Y, Bi D, Sun J, Li J, Tai C, Deng Z, Ou H-Y. ICEberg 2.0: an updated  
570 database of bacterial integrative and conjugative elements. *Nucleic Acids Res.* 2019  
571 Jan 8;47(D1):D660–D665. PMID: PMC6323972
- 572 18. Carattoli A, Zankari E, García-Fernández A, Voldby Larsen M, Lund O, Villa L, Møller  
573 Aarestrup F, Hasman H. In silico detection and typing of plasmids using PlasmidFinder  
574 and plasmid multilocus sequence typing. *Antimicrob Agents Chemother.* 2014  
575 Jul;58(7):3895–3903. PMID: PMC4068535
- 576 19. Leplae R, Lima-Mendez G, Toussaint A. ACLAME: a CLAssification of Mobile genetic  
577 Elements, update 2010. *Nucleic Acids Res.* 2010 Jan;38(Database issue):D57–61.  
578 PMID: PMC2808911
- 579 20. Leplae R, Hebrant A, Wodak SJ, Toussaint A. ACLAME: a CLAssification of Mobile  
580 genetic Elements. *Nucleic Acids Res.* 2004 Jan 1;32(Database issue):D45–9. PMID:  
581 PMC308818
- 582 21. Leplae R, Lima-Mendez G, Toussaint A. A first global analysis of plasmid encoded  
583 proteins in the ACLAME database. *FEMS Microbiol Rev.* 2006 Nov;30(6):980–994.  
584 PMID: 17064288

- 585 22. Lima-Mendez G, Oliveira Alvarenga D, Ross K, Hallet B, Van Melderen L, Varani AM,  
586 Chandler M. Toxin-Antitoxin Gene Pairs Found in Tn3 Family Transposons Appear To  
587 Be an Integral Part of the Transposition Module. *MBio*. 2020 Mar 31;11(2). PMID:  
588 PMC7157771
- 589 23. Szuplewska M, Czarnecki J, Bartosik D. Autonomous and non-autonomous Tn3-family  
590 transposons and their role in the evolution of mobile genetic elements. *Mob Genet*  
591 *Elements*. 2014 Dec;4(6):1–4. PMID: PMC4588545
- 592 24. Loftie-Eaton W, Yano H, Burleigh S, Simmons RS, Hughes JM, Rogers LM, Hunter SS,  
593 Settles ML, Forney LJ, Ponciano JM, Top EM. Evolutionary Paths That Expand Plasmid  
594 Host-Range: Implications for Spread of Antibiotic Resistance. *Mol Biol Evol*. 2016  
595 Apr;33(4):885–897. PMID: PMC4840908
- 596 25. Sayers EW, Agarwala R, Bolton EE, Brister JR, Canese K, Clark K, Connor R, Fiorini N,  
597 Funk K, Hefferon T, Holmes JB, Kim S, Kimchi A, Kitts PA, Lathrop S, Lu Z, Madden TL,  
598 Marchler-Bauer A, Phan L, Schneider VA, Schoch CL, Pruitt KD, Ostell J. Database  
599 resources of the National Center for Biotechnology Information. *Nucleic Acids Res*.  
600 2019 Jan 8;47(D1):D23–D28. PMID: PMC6323993
- 601 26. Altschul SF, Gish W, Miller W, Myers EW, Lipman DJ. Basic local alignment search tool.  
602 *J Mol Biol*. 1990 Oct 5;215(3):403–410. PMID: 2231712
- 603 27. Camacho C, Coulouris G, Avagyan V, Ma N, Papadopoulos J, Bealer K, Madden TL.  
604 BLAST+: architecture and applications. *BMC Bioinformatics*. 2009 Dec 15;10:421.  
605 PMID: PMC2803857
- 606 28. Murphy E, Huwyler L, de Freire Bastos M do C. Transposon Tn554: complete  
607 nucleotide sequence and isolation of transposition-defective and antibiotic-sensitive  
608 mutants. *EMBO J*. 1985 Dec 1;4(12):3357–3365. PMID: PMC554666
- 609 29. Bastos MC, Murphy E. Transposon Tn554 encodes three products required for  
610 transposition. *EMBO J*. 1988 Sep;7(9):2935–2941. PMID: PMC457088
- 611 30. Krolewski JJ, Murphy E, Novick RP, Rush MG. Site-specificity of the chromosomal  
612 insertion of *Staphylococcus aureus* transposon Tn554. *J Mol Biol*. 1981 Oct  
613 15;152(1):19–33. PMID: 6279864
- 614 31. Murphy E, Reinheimer E, Huwyler L. Mutational analysis of att554, the target of the  
615 site-specific transposon Tn554. *Plasmid*. 1991 Jul;26(1):20–29. PMID: 1658834
- 616 32. Haroche J, Allignet J, El Solh N. Tn5406, a new staphylococcal transposon conferring  
617 resistance to streptogramin a and related compounds including dalfopristin.  
618 *Antimicrob Agents Chemother*. 2002 Aug;46(8):2337–2343. PMID: PMC127375

- 619 33. Kehrenberg C, Schwarz S. Florfenicol-chloramphenicol exporter gene *fexA* is part of  
620 the novel transposon Tn558. *Antimicrob Agents Chemother.* 2005 Feb;49(2):813–815.  
621 PMID: PMC547298
- 622 34. Kadlec K, Schwarz S. Identification of the novel *dfrK*-carrying transposon Tn559 in a  
623 porcine methicillin-susceptible *Staphylococcus aureus* ST398 strain. *Antimicrob Agents*  
624 *Chemother.* 2010 Aug;54(8):3475–3477. PMID: PMC2916295
- 625 35. Li D, Li X-Y, Schwarz S, Yang M, Zhang S-M, Hao W, Du X-D. Tn6674 Is a Novel  
626 Enterococcal *optrA*-Carrying Multiresistance Transposon of the Tn554 Family.  
627 *Antimicrob Agents Chemother.* 2019 Aug 23;63(9). PMID: PMC6709469
- 628 36. Schwendener S, Perreten V. New transposon Tn6133 in methicillin-resistant  
629 *Staphylococcus aureus* ST398 contains *vga(E)*, a novel streptogramin A, pleuromutilin,  
630 and lincosamide resistance gene. *Antimicrob Agents Chemother.* 2011  
631 Oct;55(10):4900–4904. PMID: PMC3187003
- 632 37. Hayes F, Van Melder L. Toxins-antitoxins: diversity, evolution and function. *Crit Rev*  
633 *Biochem Mol Biol.* 2011 Oct;46(5):386–408. PMID: 21819231
- 634 38. De La Cruz F, Grinsted J. Genetic and Molecular Characterization of Tn21, a Multiple  
635 Resistance Transposon from R100.1. *J Bacteriol.* 1982;151:222–228. PMID: 6282806
- 636 39. Grinsted J, de la Cruz F, Schmitt R. The Tn21 subgroup of bacterial transposable  
637 elements. *Plasmid.* 1990 Nov;24(3):163–189. PMID: 1963947
- 638 40. Liebert CA, Hall RM, Summers AO. Transposon Tn21, flagship of the floating genome.  
639 *Microbiol Mol Biol Rev.* 1999 Sep;63(3):507–522. PMID: PMC103744
- 640 41. Tanaka M, Yamamoto T, Sawai T. Evolution of complex resistance transposons from an  
641 ancestral mercury transposon. *J Bacteriol.* 1983 Mar;153(3):1432–1438. PMID:  
642 PMC221794
- 643 42. Kholodii G, Mindlin S, Petrova M, Minakhina S. Tn5060 from the Siberian permafrost is  
644 most closely related to the ancestor of Tn21 prior to integron acquisition. *FEMS*  
645 *Microbiol Lett.* 2003 Sep 26;226(2):251–255. PMID: 14553919
- 646 43. Varani AM, Siguier P, Gourbeyre E, Charneau V, Chandler M. ISsaga is an ensemble of  
647 web-based methods for high throughput identification and semi-automatic annotation  
648 of insertion sequences in prokaryotic genomes. *Genome Biol.* 2011 Mar 28;12(3):R30.  
649 PMID: PMC3129680
- 650 44. Biswas A, Gauthier DT, Ranjan D, Zubair M. ISQuest: finding insertion sequences in  
651 prokaryotic sequence fragment data. *Bioinformatics.* 2015 Nov 1;31(21):3406–3412.  
652 PMID: 26116929

- 653 45. Nakagome M, Solovieva E, Takahashi A, Yasue H, Hirochika H, Miyao A. Transposon  
654 Insertion Finder (TIF): a novel program for detection of de novo transpositions of  
655 transposable elements. *BMC Bioinformatics*. 2014 Mar 14;15:71. PMID: PMC4004357
- 656 46. Hawkey J, Hamidian M, Wick RR, Edwards DJ, Billman-Jacobe H, Hall RM, Holt KE.  
657 ISMapper: identifying transposase insertion sites in bacterial genomes from short read  
658 sequence data. *BMC Genomics*. 2015 Sep 3;16:667. PMID: PMC4558774
- 659 47. Treepong P, Guyeux C, Meunier A, Couchoud C, Hocquet D, Valot B. panISa: ab initio  
660 detection of insertion sequences in bacterial genomes from short read sequence data.  
661 *Bioinformatics*. 2018 Nov 15;34(22):3795–3800. PMID: 29931098
- 662 48. Robinson DG, Lee M-C, Marx CJ. OASIS: an automated program for global investigation  
663 of bacterial and archaeal insertion sequences. *Nucleic Acids Res*. 2012  
664 Dec;40(22):e174. PMID: PMC3526298
- 665 49. Adams MD, Bishop B, Wright MS. Quantitative assessment of insertion sequence  
666 impact on bacterial genome architecture. *Microb Genom*. 2016 Jul 18;2(7):e000062.  
667 PMID: PMC5343135
- 668 50. Xie Z, Tang H. ISEScan: automated identification of insertion sequence elements in  
669 prokaryotic genomes. *Bioinformatics*. 2017 Nov 1;33(21):3340–3347. PMID: 29077810
- 670 51. Mogro EG, Ambrosis N, Lozano MJ. Easy identification of insertion sequence  
671 mobilization events in related bacterial strains with ISCompare. *BioRxiv*. 2020 Oct 16;
- 672 52. Johansson MHK, Bortolaia V, Tansirichaiya S, Aarestrup FM, Roberts AP, Petersen TN.  
673 Detection of mobile genetic elements associated with antibiotic resistance in  
674 *Salmonella enterica* using a newly developed web tool: MobileElementFinder. *J*  
675 *Antimicrob Chemother*. 2021 Jan 1;76(1):101–109. PMID: PMC7729385
- 676 53. Tansirichaiya S, Rahman MA, Roberts AP. The Transposon Registry. *Mob DNA*. 2019  
677 Oct 9;10:40. PMID: PMC6785933
- 678 54. El-Gebali S, Mistry J, Bateman A, Eddy SR, Luciani A, Potter SC, Qureshi M, Richardson  
679 LJ, Salazar GA, Smart A, Sonnhammer ELL, Hirsh L, Paladin L, Piovesan D, Tosatto SCE,  
680 Finn RD. The Pfam protein families database in 2019. *Nucleic Acids Res*. 2019 Jan  
681 8;47(D1):D427–D432. PMID: PMC6324024
- 682 55. Mitchell AL, Attwood TK, Babbitt PC, Blum M, Bork P, Bridge A, Brown SD, Chang H-Y,  
683 El-Gebali S, Fraser MI, Gough J, Haft DR, Huang H, Letunic I, Lopez R, Luciani A,  
684 Madeira F, Marchler-Bauer A, Mi H, Natale DA, Necci M, Nuka G, Orengo C,  
685 Pandurangan AP, Paysan-Lafosse T, Pesseat S, Potter SC, Qureshi MA, Rawlings ND,  
686 Redaschi N, Richardson LJ, Rivoire C, Salazar GA, Sangrador-Vegas A, Sigrist CJA, Sillitoe

687 I, Sutton GG, Thanki N, Thomas PD, Tosatto SCE, Yong S-Y, Finn RD. InterPro in 2019:  
688 improving coverage, classification and access to protein sequence annotations. *Nucleic*  
689 *Acids Res.* 2019 Jan 8;47(D1):D351–D360. PMCID: PMC6323941

690



A

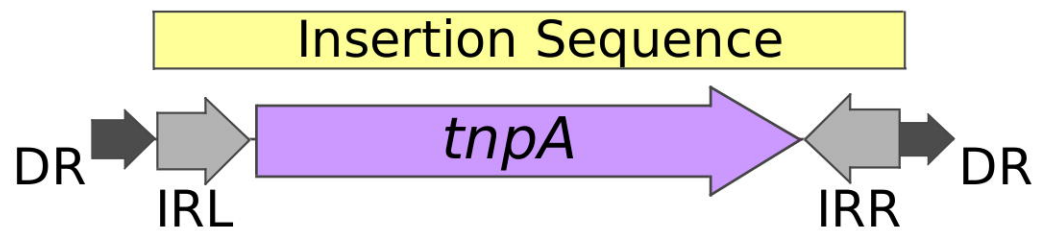

B

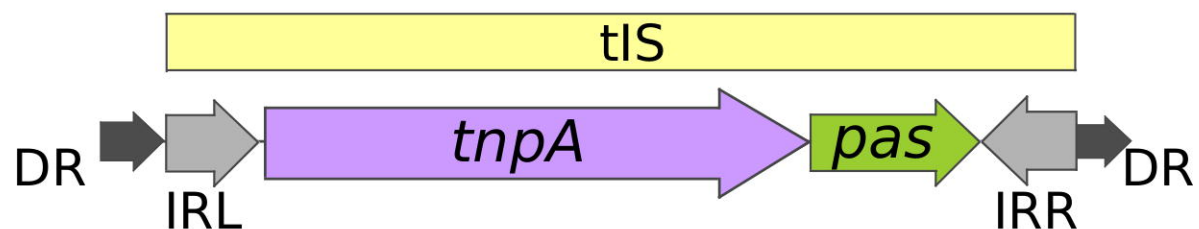

C

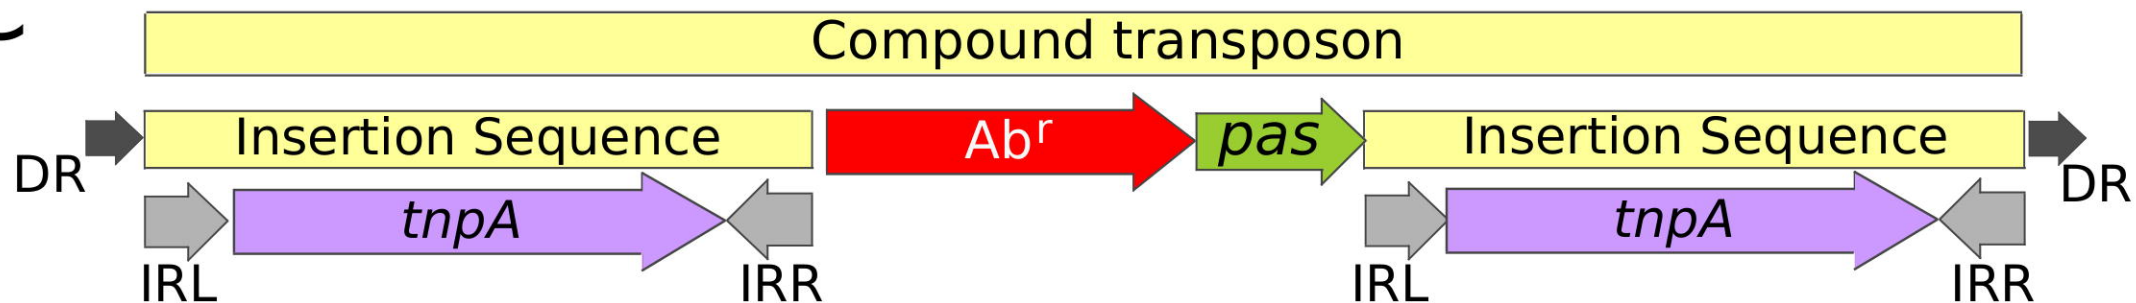

D

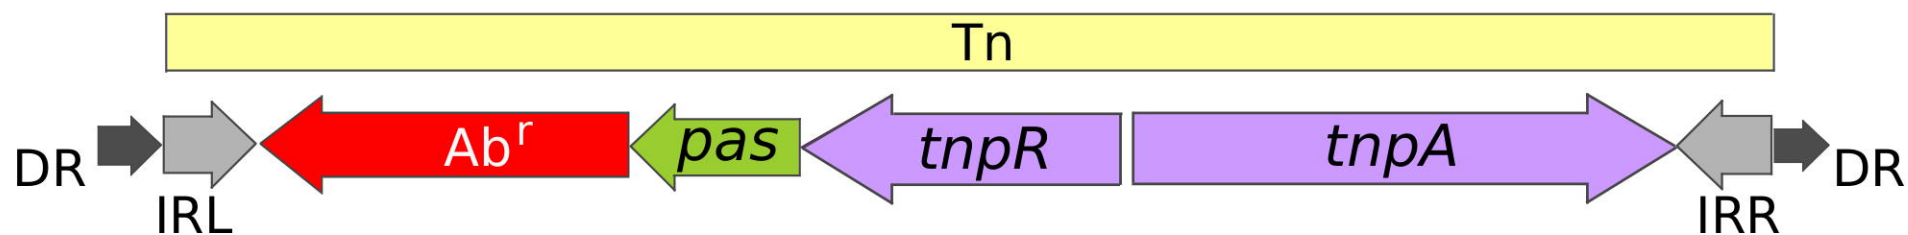



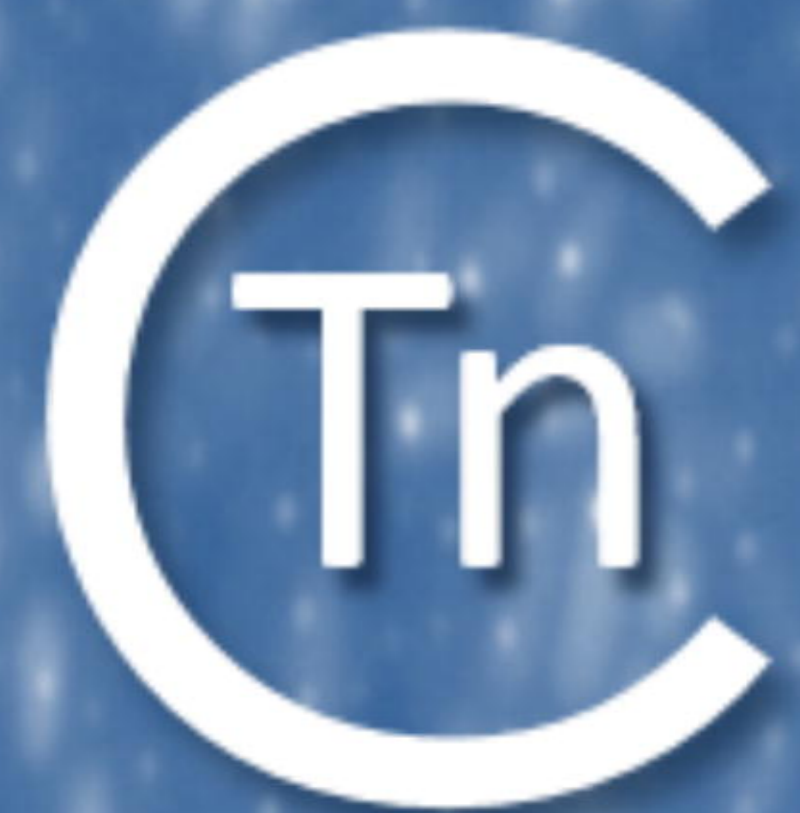

A

About

TnCentral Search

Sequence Search

Browse Tn List

TnFinder Software

Documentation

For Curators

TnPedia (TE Encyclopedia)

Related Links

Feedback

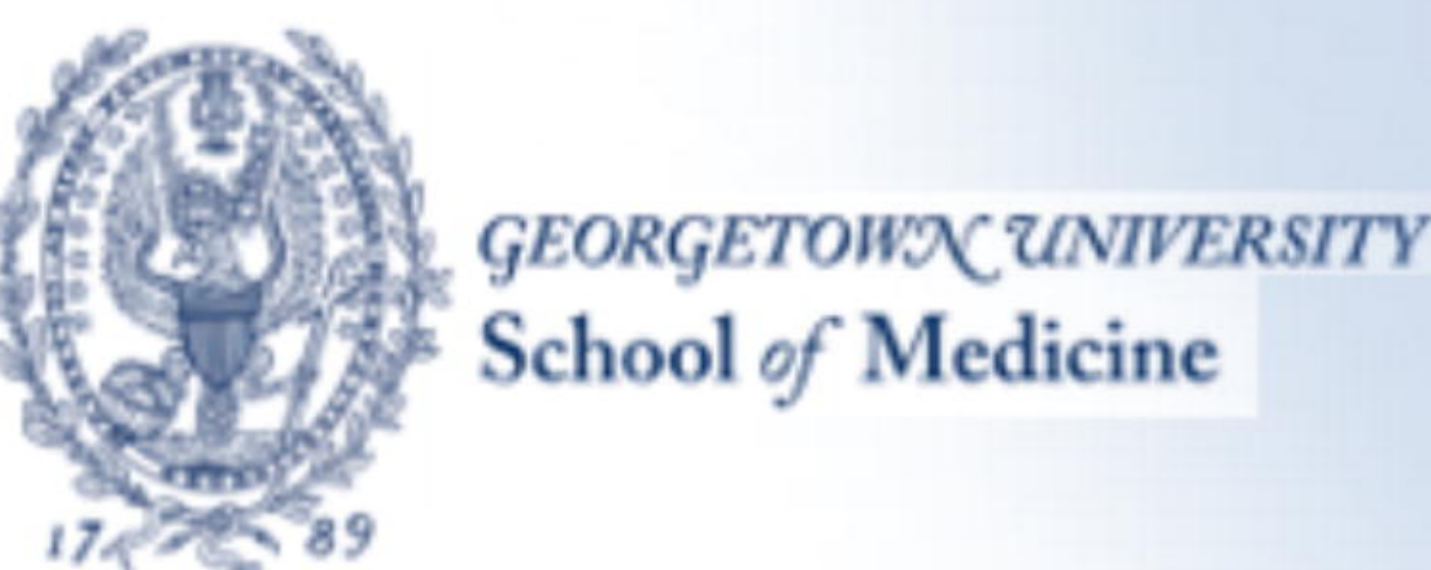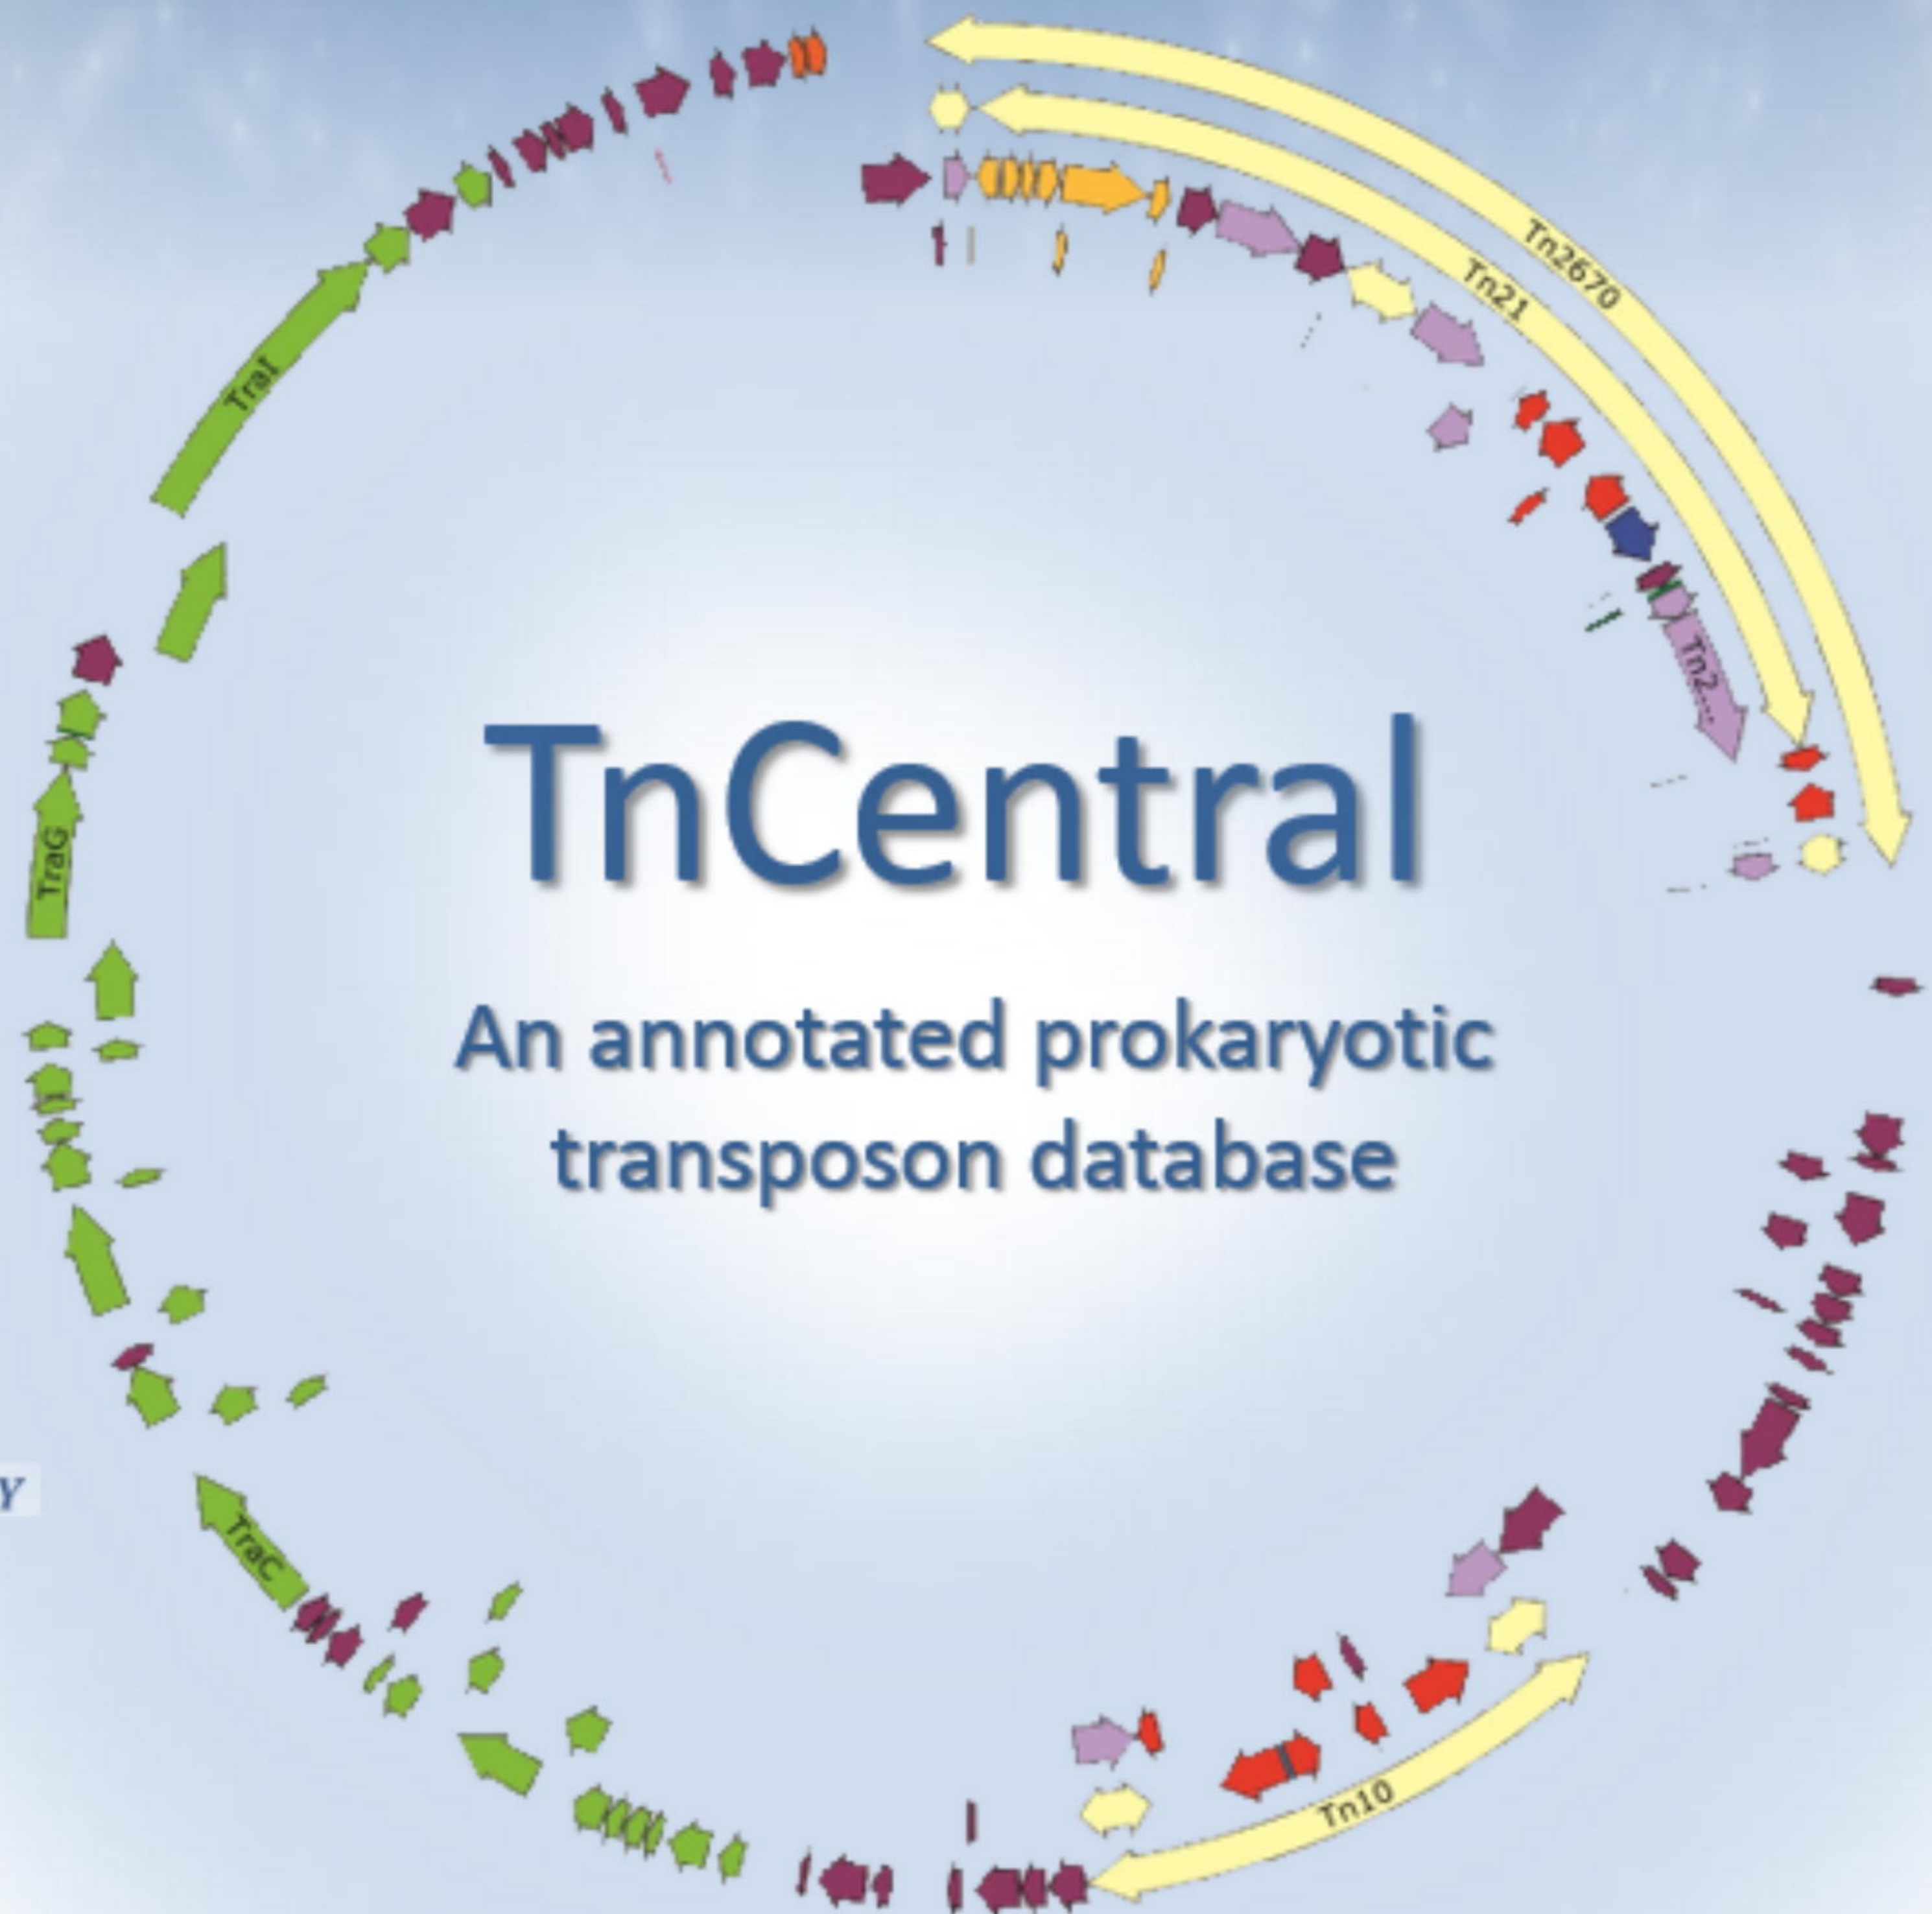

# TnCentral

An annotated prokaryotic transposon database

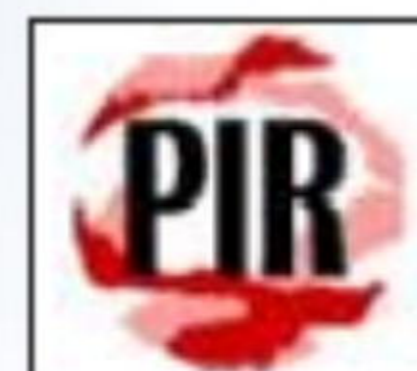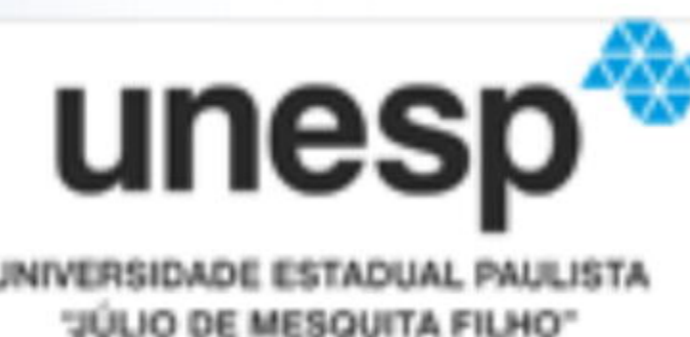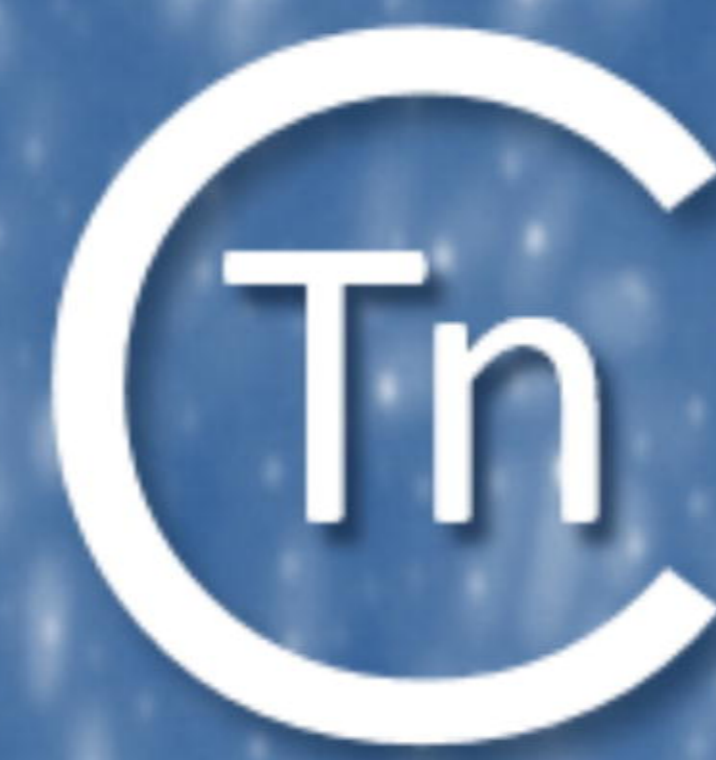

B

## TnCentral Search

### Transposon Search

Any field:

TE Name: contains

TE Synonym: contains

TE type: All

TE family: contains

TE group: contains

TnCentral accession: contains

Host organism: contains

Country:

Date of Isolation:

### Gene Search

By Gene Name:

By Gene Class:

-- Select one -----

By Gene Function:

-- Select one -----



# 1 Transposon

**Name:** Tn5501  
**Family:** Tn3 **Group:** Tn3000  
**Evidence of Transposition:** Yes

**Host**  
**Host Organism:** Delftia sp. KV29  
**Molecular Source:** plasmid pKV29  
**Date of Isolation:** 1998

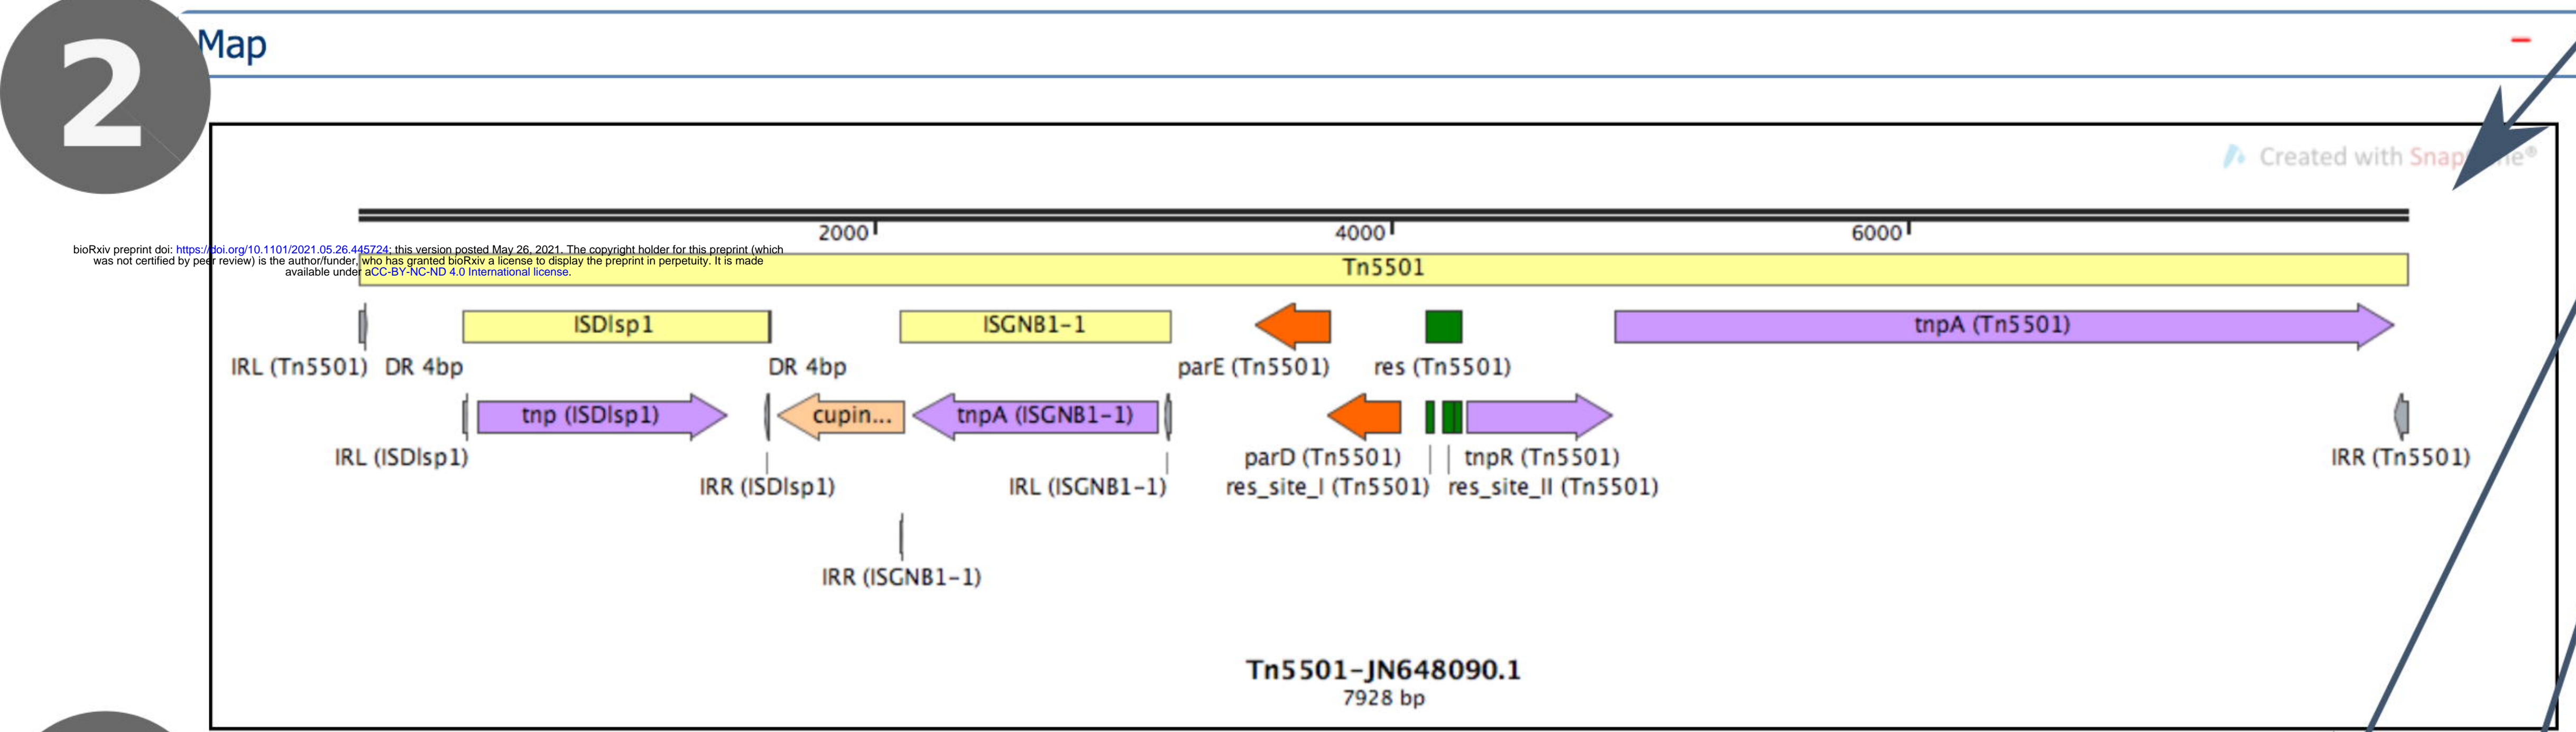

3 Terminal Inverted Repeats (IR)

IRL (Length: 38 bp) → GGGGTTCTAAGCCGGAACCGCCGAAAATTCGGTCAGCC  
 IRR (Length: 38 bp) → GGGGTTCTAAGCCAGAACCGCCGAAAATTCGGTCATCC

4 Sequence

DNA Sequence Length 7928

```

-----10 -----20 -----30 -----40 -----50 -----60 -----70 -----80 -----90 -----100
GGGGTTCTAA GCCGGAACCG CCGAAAATTC CGTCAGCCGA TCAACGTGGC TTGTCCCGCG CCCGGTCGAT GGGGTAGACC CAACAGTCGT GTCACTAGCC 100
GCCATTTCTGA TCACGGCAAT GCCAGCCGGA CGTCACGTCC AGATTGTTC GGTCTGGATG AGGCCGACTG ACGTCTCGGA TGACGGGTGG CATACAACTG 200
CTGTGAGTCC TGCAGGGGGG CAGCTGCCTG ACCGGACGGC GAGCATCAGC CCATCTCATG TATTAGTCAT GTCAGCTTTG AACTGCGCA CGCGACGGCA 300
CCCGACCCCGT TGCAGACCCC CAGACATATG GAAAGCTGAC GCTCAACGTG GAGTTAGCCG GCGCGGCGCG GCTTCATCGC GCAGCGTCCG TGTGTAGTGA 400
  
```

**Jump to:**

- Top
- Host
- Map
- Terminal Inverted Repeats
- Sequence
- Recombination Sites
- ORFs
- ORF Summary
- ORF Details
- Internal Transposable Elements
- Internal Repeats
- References

**Download:**

- Source File (GenBank format) [↓](#)
- Sequence File (FASTA format) [↓](#)

5 Recombination Sites

| Name | Coordinates | Length | Sequence                                                                                                                                               |
|------|-------------|--------|--------------------------------------------------------------------------------------------------------------------------------------------------------|
| res  | 4139-4269   | 131    | GCCTGTCGGA AACATTGT TTTTCGACAG GCCTTCAACG GTCCTCTGCA CCAACCTCCG<br>AGTGGCCGCA AAATTGTGCG GAAAACCTCTG TCGCCAGACG CTACCATACG GAAAACCTCGT<br>CTTAATGGTT T |

6 ORFs

**ORF Summary**

| Gene Name              | Associated TE | Coordinates | Class          | Sub Class | Orientation |
|------------------------|---------------|-------------|----------------|-----------|-------------|
| <a href="#">tnp</a>    | ISDsp1        | 462-1436    | Transposase    |           | +           |
| <a href="#">cupin2</a> | Tn5501        | 1626-2111   | Passenger Gene | Other     | -           |
| <a href="#">tnpA</a>   | ISGNB1-1      | 2150-3097   | Transposase    |           | -           |

7 ORF Details

| Gene Name | Protein Name | Associated TE | Length | Coordinates | Strand |
|-----------|--------------|---------------|--------|-------------|--------|
| tnp       | Tnp          | ISDsp1        | 975    | 462-1436    | +      |

**Class:** Transposase  
**Transposase Chemistry:** DDE  
**Protein Sequence:**  
 MLTGMKQSSL ELNLSTRKTR KQELLAQMDR VVPWAALVEL IAPYYPEGKN GRPPFALEAM LRVHMQQWF TSLDLAMEEA FFDTPIYREF AGLDAHGRMP  
 DESTILRFRH RLEKHLRAEQ ILATVNDLLA ARGLLLKAGT AVDATLIAAP SSTKNKDRKR DPEMHSSQKG NEWHFGMKAH IGVADADSLV HTVIGTSGNV  
 ADVTEGNSLL HGEETDAFGD AGYQGAHKRP DARKDVTWHV AMRPGKRKEL DKENNPVDAL IDQVEKIKAS IRAKVEHPFR VIKRQFGYTK VRYRGLKKNIT  
 LQLKTLFALS NLWVVRHQLL GAQG

8 Internal Transposable Elements (TE)

| TnCentral Accession | TE Name | Type               | Coordinates | Length |
|---------------------|---------|--------------------|-------------|--------|
| ISDsp1-JN648090.1   | ISDsp1  | Insertion Sequence | 409-1592    | 1184   |
| ISGNB1-1-EF628291   | ISGNB1  | Insertion Sequence | 2097-3143   | 1047   |

9 Internal Repeat Elements

| Name | Associated Mobile Element | Coordinates | Sequence (Top Strand) |
|------|---------------------------|-------------|-----------------------|
| IRL  | ISDsp1                    | 409-428     | GGAAATCCTG CAAAACCTCG |
| IRR  | ISDsp1                    | 1574-1592   | GCTCAACAAG TCCTGTAGG  |

10 References

Stolze Y, Eikmeyer F, Wibberg D, Brandis G, Karsten C, Krahn I, Schneider-Bekel S, Viehove P, Barsch A, Keck M, Top EM, Niehaus K, Schluter A. *IncP-1beta* plasmids of *Comamonas* sp. and *Delftia* sp. strains isolated from a wastewater treatment plant mediate resistance to and decolorization of the triphenylmethane dye crystal violet. *Microbiology*. 2012 Aug;158(Pt 8):2060-2072. doi: 10.1099/mic.0.059220-0. Epub 2012 May 31. PubMed ID: [22653947](#)



# General Information

1. Overview
2. Insertion Sequence History and Early Transposition Models
3. What Is an IS?
4. ISfinder and the Growing Number of IS
5. IS Identification, nomenclature and naming attribution
6. IS Distribution
7. Major Groups are Defined by the Type of Transposase They Use
8. Fuzzy Borders
9. tIS - IS and relatives with passenger genes
10. IS derivatives of Tn3 family transposons
11. IS related to Integrative Conjugative Elements (ICEs)
12. IS91 and ISCR families
13. Non-autonomous IS derivatives
14. Relationship Between IS and Eukaryotic TE
15. Impact of IS on Genome Evolution - The Importance of Time Scale
16. Target Choice
17. Influence of transposition mechanisms on genome impact
18. IS and Gene Expression
19. IS Organization
20. Control of transposition activity
21. Transposase expression and activity
22. Reaction mechanisms
23. The Casposases

# Main Page

## Welcome to TnPedla, the TnCentral Wiki

This Tnpedla has been written in an attempt to assemble a body of information (including many of the historical articles) generally dispersed in the literature as an aid to understanding how knowledge has been built up to our present view of the key role played by transposable elements (TE) in prokaryotes - both in influencing gene expression, in driving genome evolution and in facilitating horizontal gene transfer (HGT). It is divided into four sections:

### General Information on Prokaryotic Elements

A section providing general information about Transposition and Transposable Elements (TE) with emphasis on prokaryotic elements. It was originally written for ISfinder (<https://www-is.biotoul.fr/index.php>) with contributions from P. Siguier and E. Goubeyre. It contains historical, mechanistic and genetic information.

### Insertion Sequence (IS) Families

A second section describing each Insertion Sequence (IS) family in some detail. This section has been entirely updated compared to that which was included in a previous ISfinder version. It contains information from a number of reviews and from the primary literature together with analyses undertaken in the framework of ISfinder and TnCentral. P. Siguier and E. Goubeyre provided a large proportion of these analyses.

### Transposon families [In progress]

A third section presenting detailed descriptions of transposon and transposon families written in the framework of TnCentral.

# IS Families

## Prokaryotic Insertion Sequences (IS)

1. IS1 family
2. IS1595 family
3. IS3 family
4. IS481 family
5. IS4 and related families
  - 5a. IS701 family
  - 5b. ISH3 family
  - 5c. IS1634 family
6. IS5 and related IS1182 families
7. IS6 family
8. IS21 family
9. IS30 family
10. IS66 family
11. IS110 and IS1111 families
12. IS256 family
13. IS630 family
14. IS982 family
15. IS1380 family
16. ISAs1 family
17. ISL3 family
18. ISAzo13 family
19. IS607 family [In progress]
20. IS91 and related ISCR families
21. IS200/IS605 family

# Transposon families

## Prokaryotic Transposon Families

1. Composite or compound transposons
2. Tn3 family transposons
3. Tn7 family transposons
4. Tn402 family transposons
5. Tn554 family transposons

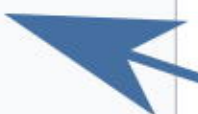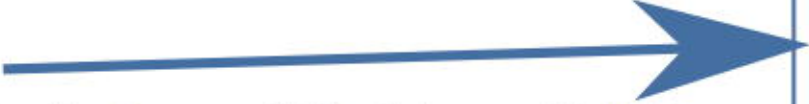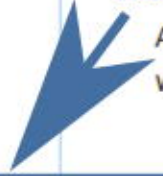



B

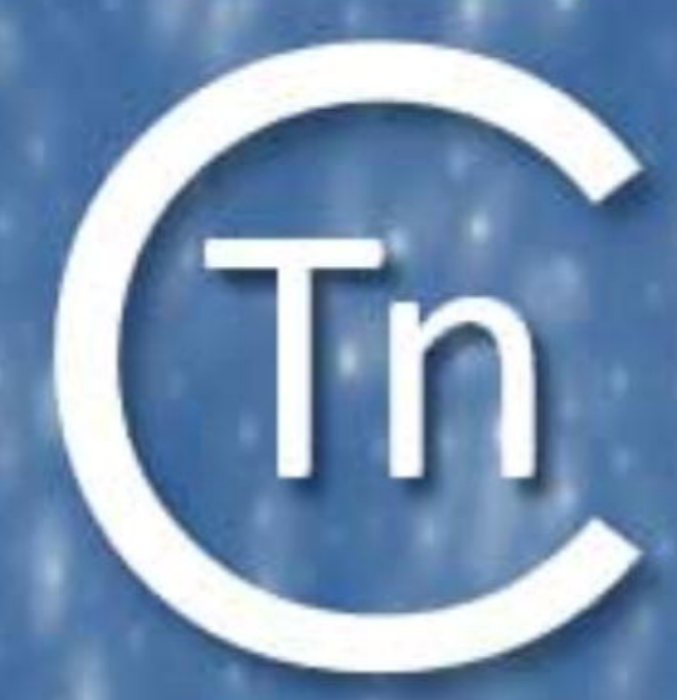

# Transposon Search

## Transposon Search Output Page

search  AND

**Page Size**  
10 items/page

**Fields Not in Display**  
Country  
Date of Isolation  
Evidence of Transposition  
First Isolate

**Fields In Display**  
All Gene Fields  
MGE Family  
MGE Name

14 entries | 2 pages | 10 / page | 1 | 2

Save Result As:

| TnCentral Accession                          | MGE Name | MGE Synonyms | MGE Type   | MGE Family | MGE Group | Host Organism                               | Country     | Date of Isolation |
|----------------------------------------------|----------|--------------|------------|------------|-----------|---------------------------------------------|-------------|-------------------|
| <input type="checkbox"/> Tn5406-AF186237     | Tn5406   |              | transposon | Tn554      |           | Staphylococcus aureus MRSA                  | Spain       | January 2011      |
| <input type="checkbox"/> Tn554-X03216.1.1    | Tn554    |              | transposon | Tn554      |           | Staphylococcus aureus                       | USA         | 1979              |
| <input type="checkbox"/> Tn554Cad-AB037671.1 | Tn554Cad |              | transposon | Tn554      |           | Staphylococcus aureus 85_2082               | New Zealand | 2001              |
| <input type="checkbox"/> Tn558-AJ715531.1    | Tn558    |              | transposon | Tn554      |           | Staphylococcus lentus                       | USA         | 2004              |
| <input type="checkbox"/> Tn558.1-AM408573.1  | Tn558.1  |              | transposon | Tn554      |           | Staphylococcus warneri                      | Denmark     | 2006              |
| <input type="checkbox"/> Tn558.2-MH018573    | Tn558.2  |              | transposon | Tn554      |           | Enterococcus Enterococcus avium strain C674 | China       | 2018              |
| <input type="checkbox"/> Tn558.3-CP025122    | Tn558.3  |              | transposon | Tn554      |           | Bacillus sp. HBCD-sjtu                      | China       | 2017              |
| <input type="checkbox"/> Tn559-FN677369      | Tn559    |              | transposon | Tn554      |           | Staphylococcus aureus ST398                 | Germany     | 2010              |
| <input type="checkbox"/> Tn6133-FR772051.1   | Tn6133   |              | transposon | Tn554      |           | Staphylococcus aureus subsp. aureus ST398   | Switzerland | 2011              |
| <input type="checkbox"/> Tn6188-HF565366     | Tn6188   |              | transposon | Tn554      |           | Listeria monocytogenes 6179                 | Austria     | 2013              |

A

## Transposon Search

Any field:

TE Name:  contains

TE Synonym:  contains

TE type:

TE family:  contains

TE group:  contains

TnCentral accession:  contains

Host organism:  contains

Country:

Date of Isolation:

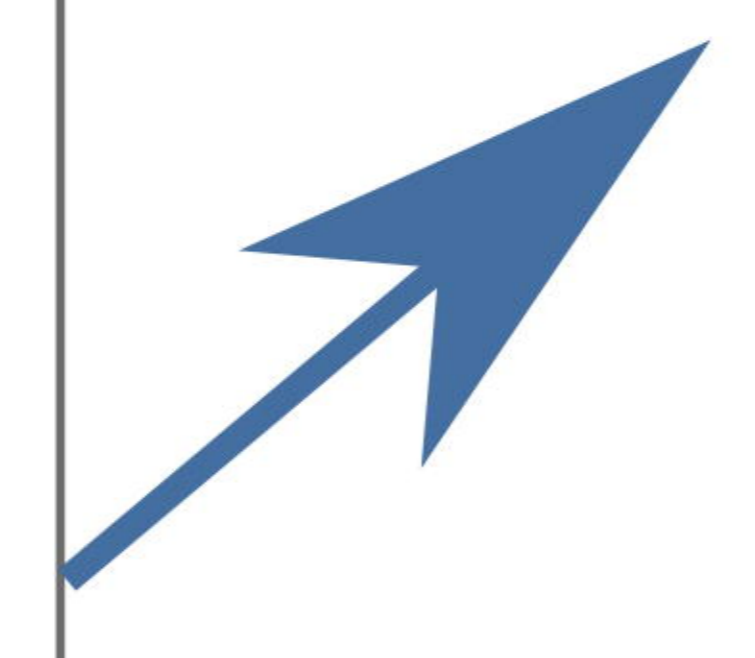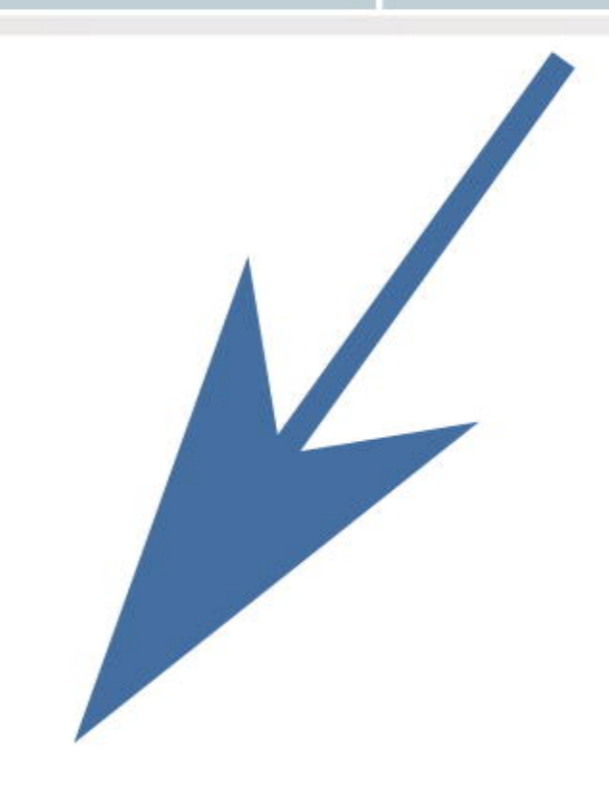

C

| TnCentral Accession                       | MGE Name | MGE Family | All Gene Fields    |                |                       |                                            |                  |                     |                                             |                                                                          |
|-------------------------------------------|----------|------------|--------------------|----------------|-----------------------|--------------------------------------------|------------------|---------------------|---------------------------------------------|--------------------------------------------------------------------------|
|                                           |          |            | Gene Name          | Gene Class     | Gene Function         | ORF Target                                 | Gene Length (bp) | Protein Length (aa) | Protein Molecular Function                  | Sequence Family                                                          |
| <input type="checkbox"/> Tn558.3-CP025122 | Tn558.3  | Tn554      | tnpA               | Transposase    |                       |                                            | 1086             | 361                 |                                             |                                                                          |
|                                           |          |            | tnpB               | Transposase    |                       |                                            | 1920             | 639                 |                                             |                                                                          |
|                                           |          |            | tnpC               | Accessory Gene | Helper                |                                            | 366              | 121                 |                                             | Tn554_family                                                             |
|                                           |          |            | fia                | Passenger Gene | Other                 |                                            | 417              | 138                 |                                             | flavodoxin                                                               |
|                                           |          |            | fexA (ARO:3002704) | Passenger Gene | Antibiotic Resistance | phenicol antibiotic (ARO:3000387)          | 1428             | 475                 | antibiotic efflux (ARO:0010000)             | major facilitator superfamily (MFS) antibiotic efflux pump (ARO:0010002) |
| <input type="checkbox"/> Tn559-FN677369   | Tn559    | Tn554      | tnpA               | Transposase    |                       |                                            | 1086             | 361                 |                                             |                                                                          |
|                                           |          |            | tnpB               | Transposase    |                       |                                            | 1893             | 630                 |                                             |                                                                          |
|                                           |          |            | tnpC               | Accessory Gene | Helper                |                                            | 378              | 125                 |                                             | Tn554_family                                                             |
|                                           |          |            | dfrK (ARO:3002869) | Passenger Gene | Antibiotic Resistance | diaminopyrimidine antibiotic (ARO:3000171) | 492              | 163                 | antibiotic target replacement (ARO:0001002) | trimethoprim resistant dihydrofolate reductase dfr (ARO:3001218)         |

bioRxiv preprint doi: <https://doi.org/10.1101/2021.01.28.416721>; this version posted May 20, 2021. The copyright holder for this preprint (which was not certified by peer review) is the author/funder, who has granted bioRxiv a license to display the preprint in perpetuity. It is made available under aCC-BY-NC-ND 4.0 International license.



A

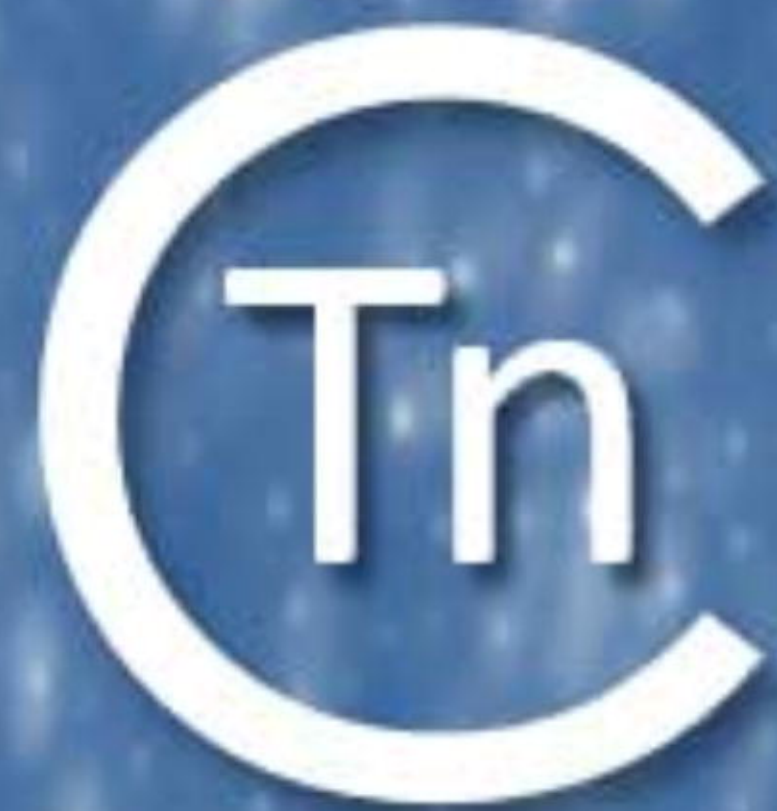

# Gene Search

## Gene Search Output Page

Gene Class: 
 Gene Sub Class: 
 Gene Target:

8 items | 1 page | 10 / page |

| Gene Name                     | Gene Class     | Gene Function | ORF Target               | MGE Accession                                                                                                       | MGE Name                                               | Host Organism                                                                                                                             | Country                               |
|-------------------------------|----------------|---------------|--------------------------|---------------------------------------------------------------------------------------------------------------------|--------------------------------------------------------|-------------------------------------------------------------------------------------------------------------------------------------------|---------------------------------------|
| <input type="checkbox"/> Gp49 | Passenger Gene | Toxin         | ribosome associated mRNA | TnpPGH1-Y09450.1<br><b>TnSku1-CP002358.1</b><br>Tn4662a.1-AY831462.1<br>Tn4662a-NC_014124.1<br>Tn5501.12-CP017294.1 | TnpPGH1<br>TnSku1<br>Tn4662a.1<br>Tn4662a<br>Tn5501.12 | Pseudomonas putida<br>Sulfuricurvum kujiense DSM 16994<br>Pseudomonas putida GJ31<br>Pseudomonas putida HS<br>Pseudomonas aeruginosa PA83 | <br>Japan<br><br><br>U.S.A<br>Germany |
| <input type="checkbox"/> HEPN | Passenger Gene | Toxin         | RNA                      | TnSod9-NC_004349                                                                                                    | TnSod9                                                 | Shewanella oneidensis MR-1                                                                                                                |                                       |
| <input type="checkbox"/> PIN  | Passenger Gene | Toxin         | single stranded RNA      | TnXca1-NC_007507<br>TnPsy42-KX009060.1<br>TnXax1.1-NC_016053                                                        | TnXca1<br>TnPsy42<br>TnXax1.1                          | Xanthomonas campestris pv. vesicatoria<br>Pseudomonas syringae pv. actinidiae RT594<br>Xanthomonas arboricola pv. pruni CFBP 55306        | <br>Japan                             |

Gene Class: 
 Gene Sub Class: 
 Gene Target:

11 items | 2 pages | 10 / page | 1 | 2

| Gene Name                       | Gene Class     | Gene Function | ORF Target | MGE Accession                                                                           | MGE Name                                     | Host Organism                                                                                         | Country              |
|---------------------------------|----------------|---------------|------------|-----------------------------------------------------------------------------------------|----------------------------------------------|-------------------------------------------------------------------------------------------------------|----------------------|
| <input type="checkbox"/> HTH    | Passenger Gene | Antitoxin     |            | TnSku1-CP002358.1                                                                       | TnSku1                                       | Sulfuricurvum kujiense DSM 16994                                                                      | Japan                |
| <input type="checkbox"/> HTH_37 | Passenger Gene | Antitoxin     |            | Tn4662a.1-AY831462.1<br>Tn4662a-NC_014124.1<br>Tn5501.12-CP017294.1<br>TnpPGH1-Y09450.1 | Tn4662a.1<br>Tn4662a<br>Tn5501.12<br>TnpPGH1 | Pseudomonas putida GJ31<br>Pseudomonas putida HS<br>Pseudomonas aeruginosa PA83<br>Pseudomonas putida | <br>U.S.A<br>Germany |
| <input type="checkbox"/> PIN_12 | Passenger Gene | Antitoxin     |            | TnBth3-CP003766                                                                         | TnBth3                                       | Bacillus thuringiensis HD-789                                                                         |                      |

## ORF Summary

| Gene Name            | Associated TE | Coordinates | Class          | Sub Class | Orientation |
|----------------------|---------------|-------------|----------------|-----------|-------------|
| <a href="#">HTH</a>  | TnSku1        | 126-416     | Passenger Gene | Antitoxin | +           |
| <a href="#">Gp49</a> | TnSku1        | 419-712     | Passenger Gene | Toxin     | +           |
| <a href="#">tnpR</a> | TnSku1        | 713-1336    | Accessory Gene | Resolvase | -           |
| <a href="#">tnpA</a> | TnSku1        | 1492-4410   | Transposase    |           | +           |

B

C



A

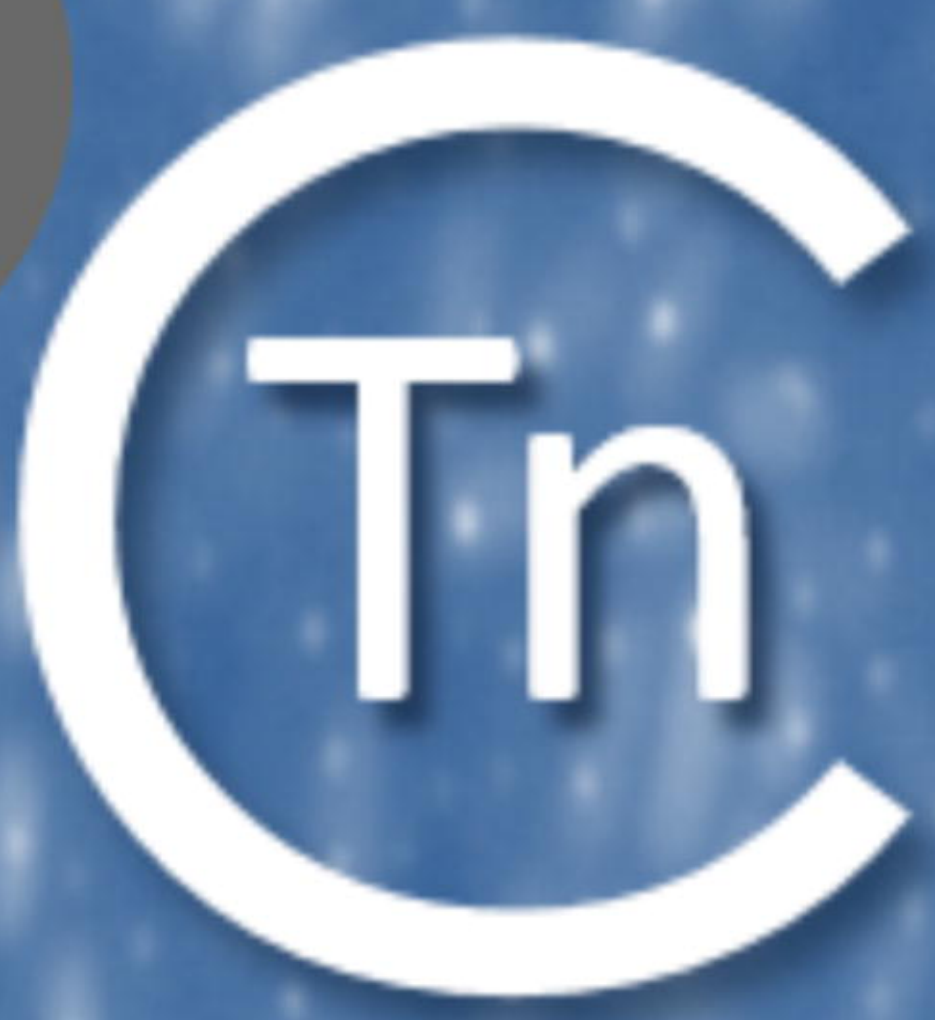

# Sequence Search (BLAST)

Job Name:

## Database

TnCentral

## Other Sequence Search Services:

iSfinder:  CARD:  Toxin/Antitoxin:  NCBI:

## Query Sequence

Enter a sequence here:

```
>Tn5060
GGGGGCACCTCAGAAAACGGAAAATAAAGCACGCTAAGGCATAGCTGACCTTGCCAGGCCTGCTTCGCCCTGTAGTGACGCGATCAACGGGCAG
GAAACATTCCCCCTTTCGTGCATGGCAGGCGCACACGAGTTCAGACAGCACGGTTTCCATGCGCGCCAAGTCGGCCATCTTCTCGCGCACGTCCT
TGAGCTTGTGTTTCGGCCAGGCTGCTGGCCTCCTCGCAGTGGGTGCCATCGTCGAGCGGCAACAGCTCGGCAATCTCGTCCAGACTGAACCCAC
CCGCTGTGCCGATTCACGAATTTACCCGAACCACGTCGCCCTCCCCATAGCGGCGGATGCTGCCGTAAGGCTTGTCGGTTCGGCAACAGG
CCCTTGCGCTGATAGAAGCGGATTGTCTCCACGCTGACCCGCGCCCTTGCCAAAACGCCAATGGTCAGGTTTCCAAATTATTTCCATAT
CGCTTGACTCCGTACATGAGTACGGAAGTAAGGTTACGCTATCCAATCCAAATTCAAAAGGGCCAACGTATGCTGAACCACAAAACGGGCGCG
GTGCGCTCTTCGGCGCGGGCTGGCCGCCATTCTTGCATCGACCTGCTGCTGGGGCCGCTAGTACTGGTCGCCCTGGGCTTCTCCGGTGCTTG
GATCGGCAACCTGACGGTGTGGAACCCTATCGACCGTTGTTTCATCGGCGCGGCGCTAGTGGCGCTGTTCTTCGCTGGAAGCGGATTACCGG
CCCGTGCAGGCATGCAAGCCAGGTGAGGTCTGCGCGATTCCGCGAGGTGCGCGCCACCTACAAGCTGATTTTCTGGATCGTGCCGCTGCTGGTCC
```

Or, upload file (Fasta format) :  No file chosen

B

| TnCentral Accession                          | TE Name | TE Length | Host Organism                                           | TE Family | Alignment (by score) |
|----------------------------------------------|---------|-----------|---------------------------------------------------------|-----------|----------------------|
| <input type="checkbox"/> Tn5060-AJ551280.1   | Tn5060  | 8667      | Pseudomonas sp. A19-1                                   | Tn3       |                      |
| <input type="checkbox"/> Tn20-AF457211.1     | Tn20    | 8644      | Escherichia coli                                        | Tn3       |                      |
| <input type="checkbox"/> Tn21-AF071413       | Tn21    | 19672     | Shigella flexneri                                       | Tn3       |                      |
| <input type="checkbox"/> TnAs3-CP000645.1    | TnAs3   | 18735     |                                                         | Tn3       |                      |
| <input type="checkbox"/> Tn21.2-MH626558     | Tn21.2  | 35400     | Salmonella enterica subsp. enterica serovar Typhimurium | Tn3       |                      |
| <input type="checkbox"/> Tn2424-UGCJ01000005 | Tn2424  | 26008     | Escherichia coli NCTC11186                              | Tn3       |                      |
| <input type="checkbox"/> Tn5086-CP054343     | Tn5086  | 15341     | Escherichia coli SCU-164                                | Tn3       |                      |
| <input type="checkbox"/> Tn1935-MK797990     | Tn1935  | 23364     | Salmonella enterica subsp. enterica serovar Wien ZM3    | Tn3       |                      |
| <input type="checkbox"/> Tn21.1-MH257753     | Tn21.1  | 21668     | Salmonella enterica subsp. enterica serovar Typhimurium | Tn3       |                      |
| <input type="checkbox"/> Tn2411-FN554766     | Tn2411  | 18055     | Escherichia coli 042                                    | Tn3       |                      |
| <input type="checkbox"/> Tn4-KY749247.1      | Tn4     | 23009     | Salmonella enterica subsp. enterica serovar Paratyphi B | Tn3       |                      |

C

|                           | Tn1935                   | Tn21           | Tn2411 | Tn4 | TnAs3     | Tn2424                      | Tn5086               | Tn21.1      | Tn21.2 |  |
|---------------------------|--------------------------|----------------|--------|-----|-----------|-----------------------------|----------------------|-------------|--------|--|
| aminoglycosides           | GNAT_fam, aadA, aph3'-Ia | GNAT_fam, aadA |        |     |           | GNAT_fam, AAC(6')-Ia, aadA3 | GNAT_fam             | aadA, aadA2 |        |  |
| sulfonamides              | sul1                     |                |        |     |           |                             |                      | sul3        |        |  |
| sulfones                  | sul1                     |                |        |     |           |                             |                      | sul3        |        |  |
| quaternary ammonium salts | qacEdelta1               |                |        |     |           |                             |                      | qacL        |        |  |
| acridine dye              | qacEdelta1               |                |        |     |           |                             |                      | qacL        |        |  |
| phenicols                 |                          |                |        |     | CAT       | catB2                       | cmIA6                |             |        |  |
| diaminopyrimidines        |                          |                |        |     |           |                             | dfrA7                | dfrA12      |        |  |
| tetracyclines             |                          |                |        |     |           |                             | tetR, tet(B), tetC_p |             |        |  |
| penams                    | bla-OXA-1                |                |        |     |           |                             |                      |             |        |  |
| cephalosporins            | bla-OXA-1                |                |        |     | bla-TEM-1 |                             |                      |             |        |  |
| penems                    |                          |                |        |     | bla-TEM-1 |                             |                      |             |        |  |
| monobactams               |                          |                |        |     | bla-TEM-1 |                             |                      |             |        |  |
